# Supplementary material for: Analysis of Movement Variability in Cycling: An Exploratory Study
Source: MDPI journal article supplement (doi:10.3390/s23104972), 2023-05-22
Supplement: s1 [file s1]

**Table S1.** IMU head, thorax acceleration state space reconstruction

| Segment/Joint (Axis) | Interval | EDim |     | ELag |     |
|----------------------|----------|------|-----|------|-----|
|                      |          | Min  | Max | Min  | Max |
| Head (X)             | 1        | 4    | 4   | 10   | 10  |
|                      | 2        | 4    | 4   | 10   | 10  |
|                      | 3        | 4    | 4   | 10   | 10  |
|                      | 4        | 4    | 4   | 10   | 10  |
|                      | 5        | 4    | 4   | 10   | 10  |
| Head (Y)             | 1        | 4    | 4   | 10   | 10  |
|                      | 2        | 4    | 4   | 10   | 10  |
|                      | 3        | 4    | 4   | 10   | 10  |
|                      | 4        | 4    | 4   | 10   | 10  |
|                      | 5        | 4    | 4   | 10   | 10  |
| Head (Z)             | 1        | 4    | 4   | 10   | 10  |
|                      | 2        | 4    | 4   | 10   | 10  |
|                      | 3        | 4    | 4   | 10   | 10  |
|                      | 4        | 4    | 4   | 5    | 10  |
|                      | 5        | 3    | 4   | 10   | 10  |
| Thorax (X)           | 1        | 4    | 4   | 10   | 10  |
|                      | 2        | 4    | 4   | 10   | 10  |
|                      | 3        | 4    | 4   | 10   | 10  |
|                      | 4        | 4    | 4   | 10   | 10  |
|                      | 5        | 4    | 4   | 10   | 10  |
| Thorax (Y)           | 1        | 4    | 4   | 10   | 10  |
|                      | 2        | 4    | 4   | 10   | 10  |
|                      | 3        | 4    | 4   | 10   | 10  |
|                      | 4        | 4    | 4   | 10   | 10  |
|                      | 5        | 4    | 4   | 10   | 10  |
| Thorax (Z)           | 1        | 4    | 4   | 9    | 10  |
|                      | 2        | 4    | 4   | 9    | 10  |
|                      | 3        | 4    | 4   | 8    | 10  |
|                      | 4        | 4    | 4   | 9    | 10  |
|                      | 5        | 4    | 4   | 8    | 10  |

Edim = embedding dimension, Elag = time delay, Min = minimum, Max = maximum

**Table S2.** IMU pelvis acceleration state space reconstruction

| Segment/Joint (Axis) | Interval | EDim |     | Elag |     |
|----------------------|----------|------|-----|------|-----|
|                      |          | Min  | Max | Min  | Max |
| Pelvis (X)           | 1        | 4    | 4   | 10   | 10  |
|                      | 2        | 4    | 4   | 10   | 10  |
|                      | 3        | 4    | 4   | 10   | 10  |
|                      | 4        | 4    | 4   | 10   | 10  |
|                      | 5        | 4    | 4   | 10   | 10  |
| Pelvis (Y)           | 1        | 4    | 4   | 10   | 10  |
|                      | 2        | 4    | 4   | 10   | 10  |
|                      | 3        | 4    | 4   | 10   | 10  |
|                      | 4        | 4    | 4   | 10   | 10  |
|                      | 5        | 4    | 4   | 10   | 10  |
| Pelvis (Z)           | 1        | 4    | 4   | 10   | 10  |
|                      | 2        | 4    | 4   | 10   | 10  |
|                      | 3        | 4    | 4   | 10   | 10  |
|                      | 4        | 4    | 4   | 10   | 10  |
|                      | 5        | 4    | 4   | 10   | 10  |

Edim = embedding dimension, Elag = time delay, Min = minimum, Max = maximum

**Table S3.** IMU shank acceleration state space reconstruction

| Segment/Joint (Axis) | Interval | EDim |     | ELag |     |
|----------------------|----------|------|-----|------|-----|
|                      |          | Min  | Max | Min  | Max |
| Left Shank (X)       | 1        | 4    | 4   | 10   | 10  |
|                      | 2        | 4    | 4   | 10   | 10  |
|                      | 3        | 4    | 4   | 10   | 10  |
|                      | 4        | 4    | 4   | 10   | 10  |
|                      | 5        | 4    | 4   | 10   | 10  |
| Left Shank (Y)       | 1        | 4    | 4   | 10   | 10  |
|                      | 2        | 4    | 4   | 10   | 10  |
|                      | 3        | 4    | 4   | 10   | 10  |
|                      | 4        | 4    | 4   | 10   | 10  |
|                      | 5        | 4    | 4   | 10   | 10  |
| Left Shank (Z)       | 1        | 4    | 4   | 10   | 10  |
|                      | 2        | 4    | 4   | 10   | 10  |
|                      | 3        | 4    | 4   | 9    | 10  |
|                      | 4        | 4    | 4   | 9    | 10  |
|                      | 5        | 4    | 4   | 10   | 10  |
| Right Shank (X)      | 1        | 4    | 4   | 10   | 10  |
|                      | 2        | 4    | 4   | 10   | 10  |
|                      | 3        | 4    | 4   | 10   | 10  |
|                      | 4        | 4    | 4   | 10   | 10  |
|                      | 5        | 4    | 4   | 10   | 10  |
| Right Shank (Y)      | 1        | 4    | 4   | 10   | 10  |
|                      | 2        | 4    | 4   | 10   | 10  |
|                      | 3        | 4    | 4   | 10   | 10  |
|                      | 4        | 4    | 4   | 10   | 10  |
|                      | 5        | 4    | 4   | 10   | 10  |
| Right Shank (Z)      | 1        | 4    | 4   | 10   | 10  |
|                      | 2        | 4    | 4   | 9    | 10  |
|                      | 3        | 4    | 4   | 10   | 10  |
|                      | 4        | 4    | 4   | 10   | 10  |
|                      | 5        | 4    | 4   | 10   | 10  |

EDim = embedding dimension, Elag = time delay, Min = minimum, Max = maximum

**Table S4.** VICON Neck, thorax kinematic state space reconstruction

| Segment/Joint (Axis) | Interval | EDim |     | ELag |     |
|----------------------|----------|------|-----|------|-----|
|                      |          | Min  | Max | Min  | Max |
| Neck (X)             | 1        | 3    | 4   | 10   | 10  |
|                      | 2        | 3    | 4   | 10   | 10  |
|                      | 3        | 3    | 4   | 2    | 10  |
|                      | 4        | 3    | 4   | 9    | 10  |
|                      | 5        | 3    | 4   | 10   | 10  |
| Neck (Y)             | 1        | 3    | 4   | 10   | 10  |
|                      | 2        | 3    | 4   | 10   | 10  |
|                      | 3        | 3    | 4   | 10   | 10  |
|                      | 4        | 3    | 4   | 10   | 10  |
|                      | 5        | 3    | 4   | 10   | 10  |
| Neck (Z)             | 1        | 3    | 4   | 10   | 10  |
|                      | 2        | 3    | 4   | 10   | 10  |
|                      | 3        | 4    | 4   | 10   | 10  |
|                      | 4        | 3    | 4   | 10   | 10  |
|                      | 5        | 3    | 4   | 10   | 10  |
| Thorax (X)           | 1        | 3    | 4   | 8    | 10  |
|                      | 2        | 3    | 4   | 8    | 10  |
|                      | 3        | 3    | 4   | 7    | 10  |
|                      | 4        | 4    | 4   | 8    | 10  |
|                      | 5        | 3    | 4   | 8    | 10  |
| Thorax (Y)           | 1        | 3    | 4   | 10   | 10  |
|                      | 2        | 3    | 4   | 10   | 10  |
|                      | 3        | 3    | 4   | 10   | 10  |
|                      | 4        | 3    | 4   | 10   | 10  |
|                      | 5        | 3    | 4   | 10   | 10  |
| Thorax (Z)           | 1        | 3    | 4   | 9    | 10  |
|                      | 2        | 3    | 4   | 10   | 10  |
|                      | 3        | 3    | 4   | 10   | 10  |
|                      | 4        | 3    | 4   | 10   | 10  |
|                      | 5        | 3    | 4   | 10   | 10  |

Edim = embedding dimension, Elag = time delay, Min = minimum, Max = maximum

**Table S5.** VICON pelvis kinematic state space reconstruction

| Segment/Joint (Axis) | Interval | EDim |     | ELag |     |
|----------------------|----------|------|-----|------|-----|
|                      |          | Min  | Max | Min  | Max |
| Pelvis (X)           | 1        | 3    | 4   | 10   | 10  |
|                      | 2        | 3    | 4   | 10   | 10  |
|                      | 3        | 3    | 4   | 9    | 10  |
|                      | 4        | 3    | 4   | 10   | 10  |
|                      | 5        | 3    | 4   | 10   | 10  |
| Pelvis (Y)           | 1        | 3    | 4   | 7    | 10  |
|                      | 2        | 3    | 4   | 8    | 10  |
|                      | 3        | 3    | 4   | 9    | 10  |
|                      | 4        | 3    | 4   | 9    | 10  |
|                      | 5        | 3    | 4   | 9    | 10  |
| Pelvis (Z)           | 1        | 3    | 4   | 10   | 10  |
|                      | 2        | 3    | 4   | 9    | 10  |
|                      | 3        | 3    | 4   | 9    | 10  |
|                      | 4        | 3    | 4   | 10   | 10  |
|                      | 5        | 3    | 4   | 10   | 10  |

Edim = embedding dimension, Elag = time delay, Min = minimum, Max = maximum

**Table S6.** VICON hip kinematics state space reconstruction

| Segment/Joint (Axis) | Interval | EDim |     | ELag |     |
|----------------------|----------|------|-----|------|-----|
|                      |          | Min  | Max | Min  | Max |
| Left Hip (X)         | 1        | 3    | 4   | 7    | 10  |
|                      | 2        | 3    | 4   | 7    | 10  |
|                      | 3        | 3    | 4   | 7    | 10  |
|                      | 4        | 4    | 4   | 7    | 10  |
|                      | 5        | 3    | 4   | 7    | 10  |
| Left Hip (Y)         | 1        | 3    | 4   | 8    | 10  |
|                      | 2        | 3    | 4   | 7    | 10  |
|                      | 3        | 3    | 4   | 7    | 10  |
|                      | 4        | 3    | 4   | 8    | 10  |
|                      | 5        | 3    | 4   | 7    | 10  |
| Left Hip (Z)         | 1        | 3    | 4   | 4    | 10  |
|                      | 2        | 3    | 4   | 4    | 10  |
|                      | 3        | 4    | 4   | 4    | 10  |
|                      | 4        | 3    | 4   | 4    | 10  |
|                      | 5        | 3    | 4   | 4    | 10  |
| Right Hip (X)        | 1        | 4    | 4   | 7    | 10  |
|                      | 2        | 4    | 4   | 7    | 10  |
|                      | 3        | 4    | 4   | 6    | 10  |
|                      | 4        | 4    | 4   | 6    | 10  |
|                      | 5        | 4    | 4   | 6    | 10  |
| Right Hip (Y)        | 1        | 3    | 4   | 8    | 10  |
|                      | 2        | 3    | 4   | 7    | 10  |
|                      | 3        | 3    | 4   | 7    | 10  |
|                      | 4        | 3    | 4   | 6    | 10  |
|                      | 5        | 3    | 4   | 7    | 10  |
| Right Hip (Z)        | 1        | 3    | 3   | 4    | 10  |
|                      | 2        | 3    | 3   | 4    | 10  |
|                      | 3        | 3    | 3   | 4    | 10  |
|                      | 4        | 3    | 3   | 4    | 10  |
|                      | 5        | 3    | 3   | 4    | 10  |

Edim = embedding dimension, Elag = time delay, Min = minimum, Max = maximum

**Table S7.** VICON knee kinematics state space reconstruction

| Segment/Joint (Axis) | Interval | EDim |     | ELag |     |
|----------------------|----------|------|-----|------|-----|
|                      |          | Min  | Max | Min  | Max |
| Left Knee (X)        | 1        | 4    | 4   | 5    | 10  |
|                      | 2        | 4    | 4   | 5    | 10  |
|                      | 3        | 4    | 4   | 5    | 10  |
|                      | 4        | 4    | 4   | 5    | 10  |
|                      | 5        | 4    | 4   | 5    | 10  |
| Left Knee (Y)        | 1        | 4    | 4   | 5    | 10  |
|                      | 2        | 4    | 4   | 5    | 10  |
|                      | 3        | 4    | 4   | 5    | 10  |
|                      | 4        | 4    | 4   | 5    | 10  |
|                      | 5        | 4    | 4   | 5    | 10  |
| Left Knee (Z)        | 1        | 3    | 3   | 3    | 10  |
|                      | 2        | 3    | 3   | 3    | 10  |
|                      | 3        | 3    | 3   | 3    | 8   |
|                      | 4        | 3    | 3   | 3    | 10  |
|                      | 5        | 3    | 3   | 3    | 10  |
| Right Knee (X)       | 1        | 4    | 4   | 6    | 10  |
|                      | 2        | 4    | 4   | 6    | 10  |
|                      | 3        | 4    | 4   | 6    | 10  |
|                      | 4        | 4    | 4   | 5    | 10  |
|                      | 5        | 4    | 4   | 5    | 10  |
| Right Knee (Y)       | 1        | 3    | 4   | 6    | 10  |
|                      | 2        | 3    | 4   | 6    | 10  |
|                      | 3        | 3    | 4   | 5    | 10  |
|                      | 4        | 3    | 4   | 6    | 10  |
|                      | 5        | 3    | 4   | 5    | 10  |
| Right Knee (Z)       | 1        | 3    | 3   | 3    | 10  |
|                      | 2        | 3    | 3   | 3    | 6   |
|                      | 3        | 3    | 3   | 3    | 5   |
|                      | 4        | 3    | 3   | 3    | 5   |
|                      | 5        | 3    | 3   | 3    | 8   |

Edim = embedding dimension, Elag = time delay, Min = minimum, Max = maximum

**Table S8.** VICON ankle kinematics state space reconstruction

| Segment/Joint (Axis) | Interval | EDim |     | ELag |     |
|----------------------|----------|------|-----|------|-----|
|                      |          | Min  | Max | Min  | Max |
| Left Ankle (X)       | 1        | 4    | 4   | 8    | 10  |
|                      | 2        | 4    | 4   | 8    | 10  |
|                      | 3        | 4    | 4   | 8    | 10  |
|                      | 4        | 4    | 4   | 7    | 10  |
|                      | 5        | 4    | 4   | 8    | 10  |
| Left Ankle (Y)       | 1        | 4    | 4   | 5    | 10  |
|                      | 2        | 4    | 4   | 5    | 10  |
|                      | 3        | 4    | 4   | 5    | 10  |
|                      | 4        | 4    | 4   | 5    | 10  |
|                      | 5        | 4    | 4   | 5    | 10  |
| Left Ankle (Z)       | 1        | 3    | 4   | 10   | 10  |
|                      | 2        | 3    | 4   | 10   | 10  |
|                      | 3        | 3    | 4   | 10   | 10  |
|                      | 4        | 3    | 4   | 10   | 10  |
|                      | 5        | 3    | 4   | 10   | 10  |
| Right Ankle (X)      | 1        | 4    | 4   | 9    | 10  |
|                      | 2        | 3    | 4   | 9    | 10  |
|                      | 3        | 3    | 4   | 7    | 10  |
|                      | 4        | 4    | 4   | 7    | 10  |
|                      | 5        | 4    | 4   | 7    | 10  |
| Right Ankle (Y)      | 1        | 4    | 4   | 7    | 10  |
|                      | 2        | 4    | 4   | 6    | 10  |
|                      | 3        | 4    | 4   | 7    | 10  |
|                      | 4        | 4    | 4   | 6    | 10  |
|                      | 5        | 4    | 4   | 6    | 10  |
| Right Ankle (Z)      | 1        | 3    | 4   | 8    | 10  |
|                      | 2        | 3    | 4   | 8    | 10  |
|                      | 3        | 3    | 4   | 9    | 10  |
|                      | 4        | 3    | 4   | 9    | 10  |
|                      | 5        | 3    | 4   | 8    | 10  |

Edim = embedding dimension, Elag = time delay, Min = minimum, Max = maximum



**Table S9:** Reliability cycling performance variables

| Value | Interval | Mean (SD)                    |                              |                              | ICC <sub>(3,1)</sub> (95%CI) |                       | ICC <sub>(3,1)</sub> mean (95%CI) |                       | TE (stzd) (LL/UL)     |                       | TE (stzd) mean (LL/UL) |                       |
|-------|----------|------------------------------|------------------------------|------------------------------|------------------------------|-----------------------|-----------------------------------|-----------------------|-----------------------|-----------------------|------------------------|-----------------------|
|       |          | Sn. 1                        | Sn. 2                        | Sn. 3                        | 2-1                          | 3-1                   | 3-2                               |                       | 2-1                   | 3-1                   | 3-2                    |                       |
| P     | 1        | 227.1<br>(72.4)              | 240.2<br>(74.1)              | 244.4<br>(68.1)              | 0.89<br>(0.67 – 0.97)        | 0.88<br>(0.64 – 0.96) | 0.87<br>(0.61 – 0.96)             | 0.88<br>(0.73 – 0.96) | 0.78<br>(0.56 – 1.33) | 0.82<br>(0.58 – 1.39) | 0.86<br>(0.61 – 1.47)  | 0.76<br>(0.61 – 1.07) |
|       | 2        | 199.0<br>(58.9) <sup>†</sup> | 211.4<br>(66.1) <sup>†</sup> | 213.8<br>(58.4) <sup>†</sup> | 0.95<br>(0.82 – 0.98)        | 0.96<br>(0.88 – 0.99) | 0.96<br>(0.88 – 0.99)             | 0.96<br>(0.90 – 0.99) | 0.54<br>(0.38 – 0.92) | 0.43<br>(0.31 – 0.73) | 0.44<br>(0.31 – 0.74)  | 0.46<br>(0.37 – 0.65) |
|       | 3        | 193.4<br>(54.2) <sup>†</sup> | 206.3<br>(62.3) <sup>†</sup> | 206.3<br>(60.0) <sup>†</sup> | 0.97<br>(0.89 – 0.99)        | 0.94<br>(0.81 – 0.98) | 0.93<br>(0.79 – 0.98)             | 0.95<br>(0.87 – 0.98) | 0.41<br>(0.29 – 0.70) | 0.56<br>(0.40 – 0.95) | 0.60<br>(0.42 – 1.01)  | 0.51<br>(0.41 – 0.72) |
|       | 4        | 196.7<br>(52.2) <sup>†</sup> | 204.7<br>(60.7) <sup>†</sup> | 205.0<br>(61.0) <sup>†</sup> | 0.97<br>(0.91 – 0.99)        | 0.94<br>(0.82 – 0.98) | 0.95<br>(0.84 – 0.99)             | 0.96<br>(0.89 – 0.99) | 0.38<br>(0.27 – 0.65) | 0.55<br>(0.39 – 0.94) | 0.51<br>(0.36 – 0.87)  | 0.47<br>(0.38 – 0.66) |
|       | 5        | 207.9<br>(46.0) <sup>†</sup> | 210.7<br>(55.7) <sup>†</sup> | 220.2<br>(60.3) <sup>†</sup> | 0.95<br>(0.83 – 0.98)        | 0.94<br>(0.81 – 0.98) | 0.95<br>(0.84 – 0.99)             | 0.95<br>(0.87 – 0.98) | 0.52<br>(0.37 – 0.89) | 0.57<br>(0.40 – 0.96) | 0.51<br>(0.36 – 0.87)  | 0.52<br>(0.41 – 0.72) |
| C     | 1        | 90.0<br>(10.0)               | 91.2<br>(9.8)                | 92.4<br>(8.0)                | 0.79<br>(0.43 – 0.94)        | 0.78<br>(0.40 – 0.93) | 0.82<br>(0.48 – 0.94)             | 0.80<br>(0.57 – 0.93) | 1.13<br>(0.80 – 1.93) | 1.17<br>(0.83 – 1.98) | 1.06<br>(0.75 – 1.79)  | 0.98<br>(0.78 – 1.37) |
|       | 2        | 86.3<br>(8.3) <sup>†</sup>   | 87.3<br>(8.9) <sup>†</sup>   | 88.4<br>(5.6) <sup>†</sup>   | 0.85<br>(0.56 – 0.95)        | 0.86<br>(0.58 – 0.96) | 0.86<br>(0.59 – 0.96)             | 0.86<br>(0.68 – 0.95) | 0.93<br>(0.66 – 1.58) | 0.90<br>(0.64 – 1.54) | 0.89<br>(0.63 – 1.52)  | 0.83<br>(0.66 – 1.16) |
|       | 3        | 85.4<br>(7.9) <sup>†</sup>   | 86.7<br>(8.3) <sup>†</sup>   | 87.1<br>(5.1) <sup>†</sup>   | 0.89<br>(0.66 – 0.97)        | 0.80<br>(0.44 – 0.94) | 0.75<br>(0.33 – 0.92)             | 0.82<br>(0.62 – 0.94) | 0.79<br>(0.56 – 1.34) | 1.11<br>(0.79 – 1.89) | 1.29<br>(0.91 – 2.18)  | 0.92<br>(0.73 – 1.29) |
|       | 4        | 86.1<br>(7.6) <sup>†</sup>   | 86.5<br>(7.8) <sup>†</sup>   | 87.0<br>(5.3) <sup>†</sup>   | 0.92<br>(0.74 – 0.98)        | 0.83<br>(0.51 – 0.95) | 0.83<br>(0.51 – 0.95)             | 0.87<br>(0.70 – 0.95) | 0.67<br>(0.47 – 1.14) | 1.01<br>(0.72 – 1.72) | 1.01<br>(0.71 – 1.71)  | 0.80<br>(0.64 – 1.13) |
|       | 5        | 88.0<br>(5.8)                | 87.5<br>(6.7) <sup>†</sup>   | 89.3<br>(5.6) <sup>†</sup>   | 0.93<br>(0.77 – 0.98)        | 0.86<br>(0.60 – 0.96) | 0.89<br>(0.66 – 0.97)             | 0.90<br>(0.76 – 0.97) | 0.63<br>(0.44 – 1.06) | 0.88<br>(0.63 – 1.50) | 0.80<br>(0.57 – 1.35)  | 0.71<br>(0.57 – 1.00) |
| F     | 1        | 139.3<br>(32.4) <sup>†</sup> | 145.2<br>(33.3) <sup>†</sup> | 146.6<br>(30.8) <sup>†</sup> | 0.90<br>(0.70 – 0.97)        | 0.91<br>(0.72 – 0.97) | 0.91<br>(0.72 – 0.97)             | 0.91<br>(0.79 – 0.97) | 0.73<br>(0.52 – 1.24) | 0.70<br>(0.50 – 1.19) | 0.70<br>(0.50 – 1.19)  | 0.67<br>(0.53 – 0.94) |
|       | 2        | 128.1<br>(27.9) <sup>†</sup> | 133.7<br>(30.8) <sup>†</sup> | 134.7<br>(28.6) <sup>†</sup> | 0.95<br>(0.83 – 0.98)        | 0.97<br>(0.90 – 0.99) | 0.97<br>(0.91 – 0.99)             | 0.96<br>(0.91 – 0.99) | 0.52<br>(0.37 – 0.89) | 0.39<br>(0.28 – 0.66) | 0.38<br>(0.27 – 0.65)  | 0.43<br>(0.34 – 0.60) |
|       | 3        | 125.9<br>(26.2) <sup>†</sup> | 131.8<br>(29.3) <sup>†</sup> | 131.8<br>(29.4) <sup>†</sup> | 0.97<br>(0.89 – 0.99)        | 0.96<br>(0.86 – 0.99) | 0.95<br>(0.84 – 0.99)             | 0.96<br>(0.90 – 0.99) | 0.41<br>(0.29 – 0.69) | 0.47<br>(0.34 – 0.81) | 0.52<br>(0.37 – 0.88)  | 0.46<br>(0.36 – 0.64) |
|       | 4        | 127.3<br>(25.3) <sup>†</sup> | 131.2<br>(28.7) <sup>†</sup> | 131.1<br>(29.9) <sup>†</sup> | 0.96<br>(0.88 – 0.99)        | 0.96<br>(0.86 – 0.99) | 0.96<br>(0.87 – 0.99)             | 0.96<br>(0.90 – 0.99) | 0.43<br>(0.31 – 0.73) | 0.48<br>(0.34 – 0.82) | 0.45<br>(0.32 – 0.77)  | 0.44<br>(0.35 – 0.62) |
|       | 5        | 132.0<br>(23.7) <sup>†</sup> | 133.9<br>(26.6) <sup>†</sup> | 137.1<br>(29.4) <sup>†</sup> | 0.94<br>(0.81 – 0.98)        | 0.95<br>(0.85 – 0.99) | 0.96<br>(0.87 – 0.99)             | 0.95<br>(0.89 – 0.98) | 0.56<br>(0.40 – 0.96) | 0.49<br>(0.35 – 0.83) | 0.45<br>(0.32 – 0.77)  | 0.49<br>(0.39 – 0.68) |
| P/m   | 1        | 3.0<br>(1.0)                 | 3.1<br>(0.9)                 | 3.2<br>(0.9)                 | 0.87<br>(0.61 – 0.96)        | 0.90<br>(0.69 – 0.97) | 0.86<br>(0.58 – 0.96)             | 0.88<br>(0.72 – 0.96) | 0.87<br>(0.62 – 1.48) | 0.75<br>(0.53 – 1.28) | 0.90<br>(0.64 – 1.54)  | 0.78<br>(0.62 – 1.09) |
|       | 2        | 2.6<br>(0.7) <sup>†</sup>    | 2.7<br>(0.8) <sup>†</sup>    | 2.8<br>(0.7) <sup>†</sup>    | 0.93<br>(0.78 – 0.98)        | 0.96<br>(0.87 – 0.99) | 0.95<br>(0.84 – 0.99)             | 0.95<br>(0.87 – 0.98) | 0.61<br>(0.43 – 1.03) | 0.45<br>(0.32 – 0.77) | 0.51<br>(0.36 – 0.87)  | 0.51<br>(0.41 – 0.72) |
|       | 3        | 2.5<br>(0.6) <sup>†</sup>    | 2.7<br>(0.7) <sup>†</sup>    | 2.7<br>(0.6) <sup>†</sup>    | 0.96<br>(0.86 – 0.99)        | 0.92<br>(0.74 – 0.98) | 0.89<br>(0.67 – 0.97)             | 0.92<br>(0.82 – 0.97) | 0.48<br>(0.34 – 0.82) | 0.67<br>(0.47 – 1.13) | 0.78<br>(0.55 – 1.32)  | 0.62<br>(0.49 – 0.87) |

| Value | Interval | Mean<br>(SD)       |                    |                    | ICC <sub>(3,1)</sub><br>(95%CI) |               | ICC <sub>(3,1)</sub> mean<br>(95%CI) |               | TE (stzd)<br>(LL/UL) |               |               | TE (stzd)<br>mean<br>(LL/UL) |
|-------|----------|--------------------|--------------------|--------------------|---------------------------------|---------------|--------------------------------------|---------------|----------------------|---------------|---------------|------------------------------|
|       |          | Sn. 1              | Sn. 2              | Sn. 3              | 2-1                             | 3-1           | 3-2                                  |               | 2-1                  | 3-1           | 3-2           |                              |
| 4     |          | 2.6                | 2.7                | 2.6                | 0.96                            | 0.92          | 0.92                                 | 0.93          | 0.46                 | 0.66          | 0.67          | 0.57                         |
|       |          | (0.6) <sup>†</sup> | (0.7) <sup>†</sup> | (0.6) <sup>†</sup> | (0.87 – 0.99)                   | (0.75 – 0.98) | (0.74 – 0.98)                        | (0.84 – 0.98) | (0.33 – 0.79)        | (0.46 – 1.11) | (0.47 – 1.13) | (0.46 – 0.81)                |
| 5     |          | 2.7                | 2.7                | 2.8                | 0.92                            | 0.91          | 0.92                                 | 0.92          | 0.66                 | 0.70          | 0.66          | 0.64                         |
|       |          | (0.5) <sup>†</sup> | (0.6) <sup>†</sup> | (0.6) <sup>†</sup> | (0.75 – 0.98)                   | (0.72 – 0.97) | (0.75 – 0.98)                        | (0.81 – 0.97) | (0.47 – 1.13)        | (0.50 – 1.19) | (0.47 – 1.12) | (0.51 – 0.89)                |

P = Power (watts), C = Cadence (revolutions/min), F = Force (Newtons), P/m = Power / mass (Watts/kg); Sn = session; SD = standard deviation; ICC = intraclass correlation coefficient; CI = confidence interval; TE (stzd) = standardized typical error; LL = lower limit; UL = upper limit.

† < 0.05 vs. Interval 1

**Table S10.** Reliability of the LyE for head acceleration

| ACC | Interval | Mean (SD)                   |                             |                                          | ICC(3,1) (95%CI)       |                       |                       | ICC(3,1) mean (95%CI) | TE (stzd) (LL/UL)     |                       |                       | TE (stzd) mean (LL/UL) |
|-----|----------|-----------------------------|-----------------------------|------------------------------------------|------------------------|-----------------------|-----------------------|-----------------------|-----------------------|-----------------------|-----------------------|------------------------|
|     |          | Sn. 1                       | Sn. 2                       | Sn. 3                                    | 2-1                    | 3-1                   | 3-2                   |                       | 2-1                   | 3-1                   | 3-2                   |                        |
| Hx  | 1        | 1.4<br>(0.3)                | 1.4<br>(0.3)                | 1.3<br>(0.2)                             | 0.72<br>(0.27-0.91)    | 0.74<br>(0.-32-0.92)  | 0.89<br>(0.67-0.97)   | 0.77<br>(0.53-0.92)   | 1.39<br>(0.98-2.36)   | 1.31<br>(0.93-2.22)   | 0.78<br>(0.55-1.32)   | 1.03<br>(0.82-1.44)    |
|     | 2        | 1.4<br>(0.2)                | 1.5<br>(0.2) <sup>a</sup>   | 1.4<br>(0.2)                             | 0.76<br>(0.35-0.92)    | 0.80<br>(0.45-0.94)   | 0.85<br>(0.55-0.95)   | 0.80<br>(0.58-0.93)   | 1.26<br>(0.89-2.14)   | 1.10<br>(0.78-1.87)   | 0.95<br>(0.67-1.61)   | 0.97<br>(0.77-1.35)    |
|     | 3        | 1.5<br>(0.2) <sup>a</sup>   | 1.5<br>(0.2) <sup>a</sup>   | 1.5<br>(0.2) <sup>a</sup>                | 0.83<br>(0.52 – 0.95)  | 0.91<br>(0.72 – 0.97) | 0.93<br>(0.77 – 0.98) | 0.89<br>(0.75 – 0.96) | 1.00<br>(0.71 – 1.69) | 0.71<br>(0.50 – 1.21) | 0.62<br>(0.44 – 1.06) | 0.73<br>(0.58 – 1.02)  |
|     | 4        | 1.6<br>(0.3) <sup>ab</sup>  | 1.6<br>(0.3) <sup>ab</sup>  | 1.5<br>(0.3) <sup>ab</sup>               | 0.86<br>(0.58 – 0.96)  | 0.90<br>(0.69 – 0.97) | 0.96<br>(0.86 – 0.99) | 0.91<br>(0.78 – 0.97) | 0.91<br>(0.64 – 1.54) | 0.75<br>(0.53 – 1.27) | 0.48<br>(0.34 – 0.82) | 0.68<br>(0.54 – 0.95)  |
|     | 5        | 1.7<br>(0.2) <sup>abc</sup> | 1.7<br>(0.2) <sup>abc</sup> | 1.7<br>(0.2) <sup>abc</sup>              | 0.88<br>(0.65 – 0.96)  | 0.77<br>(0.39 – 0.93) | 0.92<br>(0.75 – 0.98) | 0.87<br>(0.70 – 0.95) | 0.81<br>(0.58 – 1.38) | 0.99<br>(0.70-1.68)   | 0.65<br>(0.46 – 1.11) | 0.80<br>(0.64 – 1.13)  |
| Hy  | 1        | 1.2<br>(0.2)                | 1.2<br>(0.3)                | 1.3<br>(0.2)                             | 0.76<br>(0.35 – 0.92)  | 0.90<br>(0.69 – 0.97) | 0.80<br>(0.45 – 0.94) | 0.81<br>(0.60 – 0.93) | 1.26<br>(0.89 – 2.13) | 0.75<br>(0.53 – 1.28) | 1.10<br>(0.78 – 1.87) | 0.94<br>(0.75 – 1.32)  |
|     | 2        | 1.3<br>(0.2)                | 1.3<br>(0.2)                | 1.3<br>(0.2)                             | 0.69<br>(0.23 – 0.90)  | 0.79<br>(0.42 – 0.93) | 0.77<br>(0.37 – 0.93) | 0.75<br>(0.49 – 0.91) | 1.46<br>(1.04 – 2.48) | 1.15<br>(0.81 – 1.95) | 1.22<br>(0.87 – 2.08) | 1.08<br>(0.86 – 1.52)  |
|     | 3        | 1.3<br>(0.2)                | 1.4<br>(0.2)                | 1.4<br>(0.2) <sup>a</sup>                | 0.72<br>(0.28 – 0.91)  | 0.76<br>(0.36 – 0.92) | 0.90<br>(0.70 – 0.97) | 0.80<br>(0.59 – 0.93) | 1.37<br>(0.97 – 2.32) | 1.24<br>(0.88 – 2.10) | 0.74<br>(0.52 – 1.25) | 0.96<br>(0.76 – 1.34)  |
|     | 4        | 1.4<br>(0.2) <sup>ab</sup>  | 1.5<br>(0.3) <sup>ab</sup>  | 1.5<br>(0.3) <sup>ab</sup>               | 0.70<br>(0.25 – 0.90)  | 0.69<br>(0.23 – 0.90) | 0.75<br>(0.33 – 0.92) | 0.72<br>(0.45 – 0.90) | 1.43<br>(1.01 – 2.42) | 1.46<br>(1.46 – 2.27) | 1.28<br>(0.91 – 2.18) | 1.13<br>(0.90 – 1.59)  |
|     | 5        | 1.5<br>(0.2) <sup>abc</sup> | 1.6<br>(0.3) <sup>abc</sup> | 1.6<br>(0.4) <sup>abc</sup> <sub>d</sub> | 0.76<br>(0.35 – 0.92)  | 0.65<br>(0.15 – 0.88) | 0.88<br>(0.64 – 0.96) | 0.78<br>(0.55 – 0.92) | 1.25<br>(0.88 – 2.12) | 1.62<br>(1.15 – 2.75) | 0.81<br>(0.58 – 1.38) | 1.01<br>(0.81 – 1.42)  |
| Hz  | 1        | 1.3<br>(0.3)                | 1.4<br>(0.4)                | 1.4<br>(0.5)                             | 0.53<br>(-0.03 – 0.84) | 0.48<br>(-0.10-0.81)  | 0.75<br>(0.33-0.92)   | 0.61<br>(0.30 – 0.85) | 2.03<br>(1.44 – 3.45) | 2.14<br>(1.52 – 3.64) | 1.29<br>(0.91 – 2.19) | 1.31<br>(1.04 – 1.84)  |
|     | 2        | 1.4<br>(0.2)                | 1.5<br>(0.3)                | 1.5<br>(0.5)                             | 0.68<br>(0.21 – 0.90)  | 0.56<br>(0.02 – 0.85) | 0.68<br>(0.20 – 0.90) | 0.64<br>(0.34 – 0.86) | 1.50<br>(1.06 – 2.55) | 1.91<br>(1.35-3.24)   | 1.52<br>(1.07 – 2.57) | 1.27<br>(1.01 – 1.78)  |
|     | 3        | 1.5<br>(0.3) <sup>a</sup>   | 1.5<br>(0.4)                | 1.6<br>(0.6)                             | 0.68<br>(0.20 – 0.89)  | 0.65<br>(0.15 – 0.89) | 0.88<br>(0.64 – 0.96) | 0.76<br>(0.52 – 0.91) | 1.52<br>(1.08 – 2.58) | 1.60<br>(1.13-2.72)   | 0.82<br>(0.58 – 1.39) | 1.05<br>(0.84 – 1.47)  |
|     | 4        | 1.6<br>(0.3) <sup>a</sup>   | 1.6<br>(0.6) <sup>a</sup>   | 1.6<br>(0.6)                             | 0.64<br>(0.13 – 0.88)  | 0.70<br>(0.25 – 0.91) | 0.84<br>(0.54 – 0.95) | 0.75<br>(0.50 – 0.91) | 1.65<br>(1.17 – 2.81) | 1.42<br>(1.01 – 2.42) | 0.96<br>(0.68 – 1.63) | 1.07<br>(0.86 – 1.50)  |
|     | 5        | 1.7<br>(0.3) <sup>ab</sup>  | 1.7<br>(0.5) <sup>a</sup>   | 1.7<br>(0.6) <sup>ab</sup>               | 0.67<br>(0.18– 0.89)   | 0.63<br>(0.12 – 0.88) | 0.93<br>(0.77 – 0.98) | 0.78<br>(0.54 – 0.92) | 1.55<br>(1.10 – 2.63) | 1.66<br>(1.18 – 2.82) | 0.63<br>(0.45 – 1.07) | 1.02<br>(0.81 – 1.42)  |

ACC =

acceleration; Hx = head longitudinal; Hy = head medio-lateral; Hz = head anterior-posterior; Sn = session; SD = standard deviation; ICC = intraclass correlation coefficient; CI = confidence interval;

TE (stzd) = standardized typical error; LL = lower limit; UL = upper limit.

a < 0.05 vs interval 1; b < 0.05 vs. interval 2; c < 0.05 vs. interval 3; d < 0.05 vs. interval 4

**Table S11.** Reliability of the LyE for thorax acceleration

| ACC | Interval | Mean<br>(SD)                |                             |                             | ICC <sub>(3,1)</sub><br>(95%CI) |                       |                       | ICC <sub>(3,1)</sub><br>mean<br>(95%CI) | TE (stzd)<br>(LL/UL)  |                       |                       | TE (stzd)<br>mean<br>(LL/UL) |
|-----|----------|-----------------------------|-----------------------------|-----------------------------|---------------------------------|-----------------------|-----------------------|-----------------------------------------|-----------------------|-----------------------|-----------------------|------------------------------|
|     |          | Sn. 1                       | Sn. 2                       | Sn. 3                       | 2-1                             | 3-1                   | 3-2                   |                                         | 2-1                   | 3-1                   | 3-2                   |                              |
| Tx  | 1        | 1.2<br>(0.3)                | 1.2<br>(0.2)                | 1.2<br>(0.2)                | 0.73<br>(0.29 – 0.91)           | 0.80<br>(0.44 – 0.94) | 0.91<br>(0.72 – 0.97) | 0.81<br>(0.60 – 0.93)                   | 1.36<br>(0.96 – 2.30) | 1.12<br>(0.79 – 1.90) | 0.70<br>(0.50 – 1.20) | 0.95<br>(0.75 – 1.33)        |
|     | 2        | 1.3<br>(0.3)                | 1.3<br>(0.2)                | 1.3<br>(0.3)                | 0.85<br>(0.57 – 0.96)           | 0.90<br>(0.68 – 0.97) | 0.92<br>(0.75 – 0.98) | 0.89<br>(0.75 – 0.96)                   | 0.92<br>(0.65 – 1.57) | 0.76<br>(0.54 – 1.29) | 0.66<br>(0.47 – 1.12) | 0.72<br>(0.58 – 1.01)        |
|     | 3        | 1.3<br>(0.3) <sup>†</sup>   | 1.3<br>(0.2)                | 1.3<br>(0.3)                | 0.89<br>(0.67 – 0.97)           | 0.87<br>(0.61 – 0.96) | 0.93<br>(0.76 – 0.98) | 0.89<br>(0.76 – 0.96)                   | 0.78<br>(0.55 – 1.33) | 0.87<br>(0.61 – 1.47) | 0.64<br>(0.45 – 1.08) | 0.72<br>(0.57 – 1.01)        |
|     | 4        | 1.4<br>(0.3) <sub>a</sub>   | 1.3<br>(0.2) <sub>ab</sub>  | 1.3<br>(0.3) <sup>ab</sup>  | 0.86<br>(0.58 – 0.96)           | 0.86<br>(0.59 – 0.96) | 0.89<br>(0.66 – 0.97) | 0.87<br>(0.71 – 0.96)                   | 0.90<br>(0.64 – 1.53) | 0.89<br>(0.63 – 1.52) | 0.79<br>(0.56 – 1.34) | 0.79<br>(0.63 – 1.11)        |
|     | 5        | 1.4<br>(0.3) <sub>abc</sub> | 1.4<br>(0.3) <sub>abc</sub> | 1.4<br>(0.3) <sub>abc</sub> | 0.93<br>(0.78 – 0.98)           | 0.85<br>(0.56 – 0.95) | 0.91<br>(0.73 – 0.97) | 0.90<br>(0.76 – 0.97)                   | 0.61<br>(0.43 – 1.04) | 0.94<br>(0.67 – 1.60) | 0.69<br>(0.49 – 1.16) | 0.71<br>(0.57 – 1.00)        |
| Ty  | 1        | 1.4<br>(0.2)                | 1.4<br>(0.2)                | 1.3<br>(0.2)                | 0.50<br>(-0.07-0.82)            | 0.68<br>(0.20 – 0.89) | 0.65<br>(0.16 – 0.89) | 0.60<br>(0.29 – 0.85)                   | 2.17<br>(1.54 – 3.69) | 1.52<br>(1.08 – 2.58) | 1.60<br>(1.13 – 2.72) | 1.33<br>(1.05 – 1.86)        |
|     | 2        | 1.4<br>(0.3)                | 1.4<br>(0.2)                | 1.4<br>(0.2)                | 0.70<br>(0.24 – 0.90)           | 0.80<br>(0.45 – 0.94) | 0.89<br>(0.66 – 0.97) | 0.79<br>(0.56 – 0.93)                   | 1.44<br>(1.02 – 2.45) | 1.09<br>(0.78 – 1.86) | 0.80<br>(0.57 – 1.36) | 1.00<br>(0.79 – 1.40)        |
|     | 3        | 1.5<br>(0.3)                | 1.5<br>(0.2)                | 1.4<br>(0.2)                | 0.77<br>(0.37 – 0.93)           | 0.73<br>(0.30 – 0.91) | 0.89<br>(0.67 – 0.97) | 0.79<br>(0.56 – 0.92)                   | 1.23<br>(0.87 – 2.08) | 1.33<br>(0.94 – 2.26) | 0.78<br>(0.55 – 1.32) | 1.00<br>(0.80 – 1.40)        |
|     | 4        | 1.5<br>(0.3) <sub>abc</sub> | 1.5<br>(0.2) <sub>ab</sub>  | 1.5<br>(0.2) <sup>ab</sup>  | 0.72<br>(0.27 – 0.91)           | 0.76<br>(0.35 – 0.92) | 0.88<br>(0.64 – 0.96) | 0.78<br>(0.54 – 0.92)                   | 1.38<br>(0.98 – 2.34) | 1.25<br>(0.88 – 2.12) | 0.82<br>(0.58 – 1.40) | 1.02<br>(0.81 – 1.42)        |
|     | 5        | 1.6<br>(0.3) <sub>abc</sub> | 1.6<br>(0.3) <sub>abc</sub> | 1.6<br>(0.2) <sub>abc</sub> | 0.88<br>(0.63 – 0.96)           | 0.78<br>(0.41 – 0.93) | 0.93<br>(0.79 – 0.98) | 0.86<br>(0.69 – 0.95)                   | 0.84<br>(0.59 – 1.42) | 1.17<br>(0.83 – 1.98) | 0.60<br>(0.43 – 1.02) | 0.81<br>(0.65 – 1.14)        |
| Tz  | 1        | 1.6<br>(0.6)                | 1.7<br>(0.5)                | 1.7<br>(0.5)                | 0.50<br>(-0.07-0.83)            | 0.58<br>(0.03 – 0.86) | 0.92<br>(0.74 – 0.98) | 0.65<br>(0.35 – 0.87)                   | 2.16<br>(1.53 – 3.67) | 1.87<br>(1.33 – 3.18) | 0.67<br>(0.48 – 1.14) | 1.26<br>(1.00 – 1.76)        |
|     | 2        | 1.8<br>(0.4) <sub>a</sub>   | 1.8<br>(0.4)                | 1.8<br>(0.5)                | 0.74<br>(0.32 – 0.92)           | 0.63<br>(0.12 – 0.88) | 0.94<br>(0.80 – 0.98) | 0.78<br>(0.54 – 0.92)                   | 1.31<br>(0.92 – 2.22) | 1.68<br>(1.19 – 2.85) | 0.57<br>(0.41 – 0.98) | 1.02<br>(0.81 – 1.42)        |
|     | 3        | 1.9<br>(0.3) <sub>a</sub>   | 1.8<br>(0.4)                | 1.9<br>(0.4)                | 0.82<br>(0.48 – 0.94)           | 0.79<br>(0.42 – 0.93) | 0.98<br>(0.94 – 0.99) | 0.87<br>(0.71 – 0.96)                   | 1.05<br>(0.75 – 1.79) | 1.14<br>(0.81 – 1.94) | 0.31<br>(0.22 – 0.53) | 0.79<br>(0.63 – 1.11)        |
|     | 4        | 2.0<br>(0.3) <sup>a</sup>   | 1.9<br>(0.5) <sub>a</sub>   | 2.0<br>(0.3) <sub>a</sub>   | 0.64<br>(0.13 – 0.88)           | 0.81<br>(0.46 – 0.94) | 0.88<br>(0.62 – 0.96) | 0.77<br>(0.53 – 0.92)                   | 1.65<br>(1.17 – 2.80) | 1.09<br>(0.77 – 1.85) | 0.84<br>(0.60 – 1.43) | 1.03<br>(0.82 – 1.45)        |
|     | 5        | 2.0<br>(0.3) <sub>ab</sub>  | 2.0<br>(0.4) <sub>a</sub>   | 2.0<br>(0.4) <sub>ab</sub>  | 0.65<br>(0.15 – 0.89)           | 0.56<br>(0.02 – 0.85) | 0.96<br>(0.86 – 0.99) | 0.75<br>(0.50 – 0.91)                   | 1.60<br>(1.13 – 2.72) | 1.92<br>(1.36 – 3.25) | 0.47<br>(0.33 – 0.79) | 1.07<br>(0.85 – 1.50)        |

ACC = acceleration Tx = thorax longitudinal direction, Ty = thorax medio-lateral, Tz = thorax anterior-posterior, Sn = session; SD = standard deviation; ICC= intraclass correlation

coefficient; CI = confidence interval; TE (stdz) = standardized typical error; LL = lower limit; UL = upper limit.

† < 0.05 vs. Sn. 1; ‡ < 0.05 vs. Sn. 2. a < 0.05 vs interval 1; b < 0.05 vs. interval 2; c < 0.05 vs. interval 3

**Table S12.** Reliability of the LyE for pelvis acceleration

| ACC | Interval | Mean (SD)    |                           |                           | ICC <sub>(3,1)</sub> (95%CI) |                       |                       | ICC <sub>(3,1)</sub> mean (95%CI) |                        |                       | TE (stzd) (LL/UL)     |                       | TE (stzd) mean (LL/UL) |  |
|-----|----------|--------------|---------------------------|---------------------------|------------------------------|-----------------------|-----------------------|-----------------------------------|------------------------|-----------------------|-----------------------|-----------------------|------------------------|--|
|     |          | Sn. 1        | Sn. 2                     | Sn. 3                     | 2-1                          | 3-1                   | 3-2                   | 2-1                               | 3-1                    | 3-2                   |                       |                       |                        |  |
| Px  | 1        | 1.4<br>(0.3) | 1.3<br>(0.2)              | 1.2<br>(0.2) <sub>†</sub> | 0.01<br>(-0.55-0.56)         | 0.07<br>(-0.50 -0.60) | 0.50<br>(-0.07-0.83)  | 0.13<br>(-0.14-0.53)              | 21.79<br>(15.44-37.00) | 7.77<br>(5.51-13.20)  | 2.16<br>(1.53 – 3.67) | 1.87<br>(1.49 – 2.63) |                        |  |
|     | 2        | 1.3<br>(0.2) | 1.2<br>(0.2)              | 1.2<br>(0.1) <sub>†</sub> | 0.15<br>(-0.44-0.65)         | 0.22<br>(-0.38-0.69)  | 0.64<br>(0.13-0.88)   | 0.27<br>(-0.04-0.64)              | 5.07<br>(3.59 – 8.60)  | 4.05<br>(2.87 – 6.88) | 1.64<br>(1.17 – 2.79) | 1.74<br>(1.39 – 2.44) |                        |  |
|     | 3        | 1.3<br>(0.3) | 1.2<br>(0.2)              | 1.2<br>(0.2)              | 0.02<br>(-0.54-0.57)         | 0.40<br>(-0.20-0.78)  | 0.68<br>(0.20 – 0.90) | 0.32<br>(0.00 – 0.68)             | 13.34<br>(9.45-22.66)  | 2.64<br>(1.87 – 4.47) | 1.51<br>(1.87 – 4.47) | 1.69<br>(1.34 – 2.36) |                        |  |
|     | 4        | 1.3<br>(0.2) | 1.2<br>(0.2)              | 1.2<br>(0.2)              | 0.05<br>(-0.52-0.59)         | 0.50<br>(-0.07-0.82)  | 0.73<br>(0.29 – 0.91) | 0.39<br>(0.06 – 0.73)             | 8.96<br>(6.35-15.22)   | 2.17<br>(1.54 – 3.68) | 1.35<br>(0.96 – 2.30) | 1.61<br>(1.28 – 2.25) |                        |  |
|     | 5        | 1.3<br>(0.2) | 1.2<br>(0.2)              | 1.2<br>(0.2)              | 0.12<br>(-0.46-0.63)         | 0.59<br>(0.05 – 0.86) | 0.62<br>(0.10 – 0.87) | 0.46<br>(0.13 – 0.77)             | 5.74<br>(4.07 – 9.75)  | 1.82<br>(1.29 – 3.10) | 1.72<br>(1.22 – 2.92) | 1.52<br>(1.21 – 2.13) |                        |  |
| Py  | 1        | 1.4<br>(0.2) | 1.4<br>(0.2)              | 1.4<br>(0.2)              | 0.00<br>(-0.55-0.55)         | 0.06<br>(-0.51-0.59)  | 0.63<br>(0.12 – 0.88) | 0.16<br>(-0.12-0.56)              | 43.14<br>(30.56-73.66) | 8.63<br>(6.11-14.65)  | 1.68<br>(1.19 – 2.85) | 1.85<br>(1.47 – 2.59) |                        |  |
|     | 2        | 1.4<br>(0.2) | 1.3<br>(0.2) <sub>a</sub> | 1.3<br>(0.1)              | 0.13<br>(-0.45 – 0.64)       | 0.18<br>(-0.41-0.67)  | 0.79<br>(0.41 – 0.93) | 0.31<br>(-0.01-0.67)              | 5.45<br>(3.86 – 9.26)  | 4.52<br>(3.20 – 7.67) | 1.16<br>(0.82 – 1.97) | 1.70<br>(1.35 – 2.38) |                        |  |
|     | 3        | 1.4<br>(0.2) | 1.4<br>(0.2)              | 1.3<br>(0.1)              | 0.37<br>(-0.23-0.77)         | 0.35<br>(-0.25-0.76)  | 0.78<br>(0.41-0.93)   | 0.46<br>(0.13-0.77)               | 2.82<br>(2.00-4.78)    | 2.91<br>(2.06-4.93)   | 1.16<br>(0.82-1.97)   | 1.52<br>(1.21 – 2.12) |                        |  |
|     | 4        | 1.4<br>(0.2) | 1.4<br>(0.2)              | 1.4<br>(0.1)              | 0.44<br>(-0.15-0.80)         | 0.44<br>(-0.15-0.80)  | 0.72<br>(0.28 – 0.91) | 0.52<br>(0.19 – 0.80)             | 2.44<br>(1.73 – 4.14)  | 2.44<br>(1.73 – 4.14) | 1.36<br>(0.97 – 2.32) | 1.45<br>(1.15 – 2.03) |                        |  |
|     | 5        | 1.4<br>(0.2) | 1.4<br>(0.2)              | 1.4<br>(0.2)              | 0.61<br>(0.09 – 0.87)        | 0.57<br>(0.03 – 0.86) | 0.71<br>(0.26 – 0.91) | 0.63<br>(0.33 – 0.86)             | 1.73<br>(1.23 – 2.94)  | 1.88<br>(1.33 – 3.19) | 1.40<br>(0.99 – 2.38) | 1.28<br>(1.02 – 1.79) |                        |  |
| Pz  | 1        | 1.9<br>(0.3) | 1.8<br>(0.5)              | 1.7<br>(0.3) <sub>†</sub> | 0.53<br>(-0.04-0.84)         | 0.49<br>(-0.08-0.82)  | 0.69<br>(0.21 – 0.90) | 0.58<br>(0.26 – 0.83)             | 2.06<br>(1.46 – 3.50)  | 2.20<br>(1.56 – 3.74) | 1.49<br>(1.06 – 2.53) | 1.36<br>(1.08 – 1.90) |                        |  |
|     | 2        | 1.8<br>(0.3) | 1.7<br>(0.4)              | 1.7<br>(0.3)              | 0.77<br>(0.37 – 0.93)        | 0.71<br>(0.26 – 0.91) | 0.65<br>(0.16 – 0.89) | 0.71<br>(0.44 – 0.89)             | 1.22<br>(0.87 – 2.08)  | 1.41<br>(1.00 – 2.39) | 1.60<br>(1.13 – 2.71) | 1.15<br>(0.91 – 1.61) |                        |  |
|     | 3        | 1.8<br>(0.3) | 1.7<br>(0.4)              | 1.7<br>(0.3)              | 0.82<br>(0.49 – 0.95)        | 0.79<br>(0.42 – 0.93) | 0.62<br>(0.10 – 0.87) | 0.74<br>(0.49 – 0.91)             | 1.04<br>(0.73 – 1.76)  | 1.14<br>(0.81 – 1.94) | 1.72<br>(1.22 – 2.93) | 1.09<br>(0.86 – 1.52) |                        |  |
|     | 4        | 1.8<br>(0.3) | 1.7<br>(0.4)              | 1.7<br>(0.3)              | 0.78<br>(0.39 – 0.93)        | 0.83<br>(0.51 – 0.95) | 0.60<br>(0.08 – 0.87) | 0.73<br>(0.47 – 0.90)             | 1.19<br>(0.84 – 2.01)  | 1.00<br>(0.71 – 1.71) | 1.77<br>(1.25 – 3.00) | 1.11<br>(0.88 – 1.55) |                        |  |
|     | 5        | 1.8<br>(0.3) | 1.8<br>(0.3)              | 1.7<br>(0.3)              | 0.81<br>(0.47 – 0.94)        | 0.89<br>(0.67 – 0.97) | 0.84<br>(0.53 – 0.95) | 0.84<br>(0.66 – 0.95)             | 1.07<br>(0.76 – 1.82)  | 0.77<br>(0.55 – 1.31) | 0.98<br>(0.70 – 1.67) | 0.86<br>(0.69 – 1.21) |                        |  |

ACC = acceleration Px = pelvis longitudinal direction, Py = pelvis medio-lateral, Pz = pelvis anterior-posterior, Sn = session; SD = standard deviation; ICC= intraclass correlation coefficient; CI = confidence interval; TE (stzd) = standardized typical error; LL = lower limit; UL = upper limit. † < 0.05 vs. Sn. 1; ‡ < 0.05 vs. Sn. 2. a < 0.05 vs interval 2

**Table S13.** Reliability of the LyE for the left shank acceleration

| ACC | Interval | Mean (SD) |                    |                    | ICC <sub>(3,1)</sub> (95%CI) |              |               | ICC <sub>(3,1)</sub> mean (95%CI) |               |               | TE (stdz) (LL/UL) |               |     | TE (stdz) mean (LL/UL) |     |     |
|-----|----------|-----------|--------------------|--------------------|------------------------------|--------------|---------------|-----------------------------------|---------------|---------------|-------------------|---------------|-----|------------------------|-----|-----|
|     |          | Sn. 1     | Sn. 2              | Sn. 3              | 2-1                          | 3-1          | 3-2           | 2-1                               | 3-1           | 3-2           | 2-1               | 3-1           | 3-2 | 2-1                    | 3-1 | 3-2 |
| LSx | 1        | 2.7       | 2.8                | 2.8                | 0.58                         | 0.70         | 0.82          | 0.70                              | 1.84          | 1.45          | 1.03              | 1.17          |     |                        |     |     |
|     |          | (0.2)     | (0.3)              | (0.2)              | (0.05-0.86)                  | (0.24-0.90)  | (0.50 - 0.95) | (0.42 - 0.89)                     | (1.30 - 3.13) | (1.03 - 2.46) | (0.73 – 1.74)     | (0.93 – 1.64) |     |                        |     |     |
|     | 2        | 2.7       | 2.7                | 2.7                | 0.61                         | 0.73         | 0.83          | 0.72                              | 1.75          | 1.33          | 1.02              | 1.13          |     |                        |     |     |
|     |          | (0.3)     | (0.3)              | (0.3)              | (0.09-0.87)                  | (0.30-0.92)  | (0.51-0.95)   | (0.45 – 0.90)                     | (1.24 – 2.97) | (0.94 – 2.25) | (0.73 – 1.73)     | (0.90 – 1.58) |     |                        |     |     |
|     | 3        | 2.7       | 2.8                | 2.7                | 0.69                         | 0.72         | 0.92          | 0.78                              | 1.46          | 1.36          | 0.68              | 1.02          |     |                        |     |     |
|     |          | (0.3)     | (0.3) <sub>†</sub> | (0.3)              | (0.23-0.90)                  | (0.29-0.91)  | (0.74-0.98)   | (0.54-0.92)                       | (1.03-2.48)   | (0.96-2.31)   | (0.48-1.16)       | (0.81-1.43)   |     |                        |     |     |
|     | 4        | 2.7       | 2.8                | 2.8                | 0.59                         | 0.76         | 0.89          | 0.74                              | 1.81          | 1.24          | 0.79              | 1.09          |     |                        |     |     |
|     |          | (0.3)     | (0.3) <sub>†</sub> | (0.3) <sub>†</sub> | (0.06-0.86)                  | (0.36-0.92)  | (0.66-0.97)   | (0.49 – 0.91)                     | (1.28 – 3.08) | (0.88 – 2.11) | (0.56 – 1.33)     | (0.87 – 1.52) |     |                        |     |     |
|     | 5        | 2.7       | 2.7                | 2.8                | 0.50                         | 0.74         | 0.88          | 0.72                              | 2.18          | 1.31          | 0.84              | 1.14          |     |                        |     |     |
|     |          | (0.2)     | (0.3)              | (0.3)              | (-0.08-0.82)                 | (0.32-0.92)  | (0.63-0.96)   | (0.45 – 0.90)                     | (1.54 – 3.70) | (0.93 – 2.22) | (0.60 – 1.43)     | (0.90 – 1.59) |     |                        |     |     |
| LSy | 1        | 3.1       | 3.2                | 3.1                | 0.35                         | 0.39         | 0.91          | 0.55                              | 2.91          | 2.70          | 0.71              | 1.40          |     |                        |     |     |
|     |          | (0.2)     | (0.2)              | (0.2)              | (-0.25-0.76)                 | (-0.21-0.78) | (0.72-0.97)   | (0.23 – 0.82)                     | (2.06 – 4.94) | (1.91 – 4.58) | (0.50 – 1.20)     | (1.12 – 1.96) |     |                        |     |     |
|     | 2        | 3.0       | 3.1                | 3.1                | 0.50                         | 0.48         | 0.88          | 0.63                              | 2.19          | 2.25          | 0.82              | 1.29          |     |                        |     |     |
|     |          | (0.2)     | (0.3)              | (0.2)              | (-0.08-0.82)                 | (-0.10-0.82) | (0.64-0.96)   | (0.32 – 0.86)                     | (1.55 – 3.71) | (1.59 – 3.81) | (0.58 – 1.39)     | (1.02 – 1.80) |     |                        |     |     |
|     | 3        | 3.0       | 3.1                | 3.1                | 0.68                         | 0.55         | 0.89          | 0.70                              | 1.52          | 1.98          | 0.78              | 1.17          |     |                        |     |     |
|     |          | (0.3)     | (0.2) <sub>†</sub> | (0.2)              | (0.20-0.89)                  | (-0.01-0.84) | (0.67-0.97)   | (0.42-0.89)                       | (1.08-2.58)   | (1.40-3.36)   | (0.55-1.32)       | (0.93-1.64)   |     |                        |     |     |
|     | 4        | 3.0       | 3.1                | 3.1                | 0.73                         | 0.59         | 0.85          | 0.71                              | 1.34          | 1.81          | 0.92              | 1.15          |     |                        |     |     |
|     |          | (0.3)     | (0.2) <sub>†</sub> | (0.2) <sub>†</sub> | (0.30-0.91)                  | (0.06-0.86)  | (0.57-0.96)   | (0.44 – 0.89)                     | (0.95-2.28)   | (1.28 – 3.07) | (0.65 – 1.57)     | (0.91-1.60)   |     |                        |     |     |
|     | 5        | 3.0       | 3.1                | 3.1                | 0.70                         | 0.64         | 0.86          | 0.72                              | 1.43          | 1.63          | 0.91              | 1.13          |     |                        |     |     |
|     |          | (0.3)     | (0.2) <sub>†</sub> | (0.2) <sub>†</sub> | (0.24-0.90)                  | (0.14-0.88)  | (0.58-0.96)   | (0.45 – 0.90)                     | (1.01 – 2.43) | (1.15 – 2.76) | (0.64 – 1.55)     | (0.90 – 1.58) |     |                        |     |     |
| LSz | 1        | 3.1       | 3.3                | 3.1                | 0.24                         | 0.53         | 0.78          | 0.60                              | 2.05          | 1.98          | 1.10              | 1.28          |     |                        |     |     |
|     |          | (0.3)     | (0.2)              | (0.3)              | (-0.36-0.70)                 | (-0.03-0.84) | (0.61-0.88)   | (0.44-0.75)                       | (1.67-2.66)   | (1.61-2.56)   | (0.90-1.42)       | (1.12-1.51)   |     |                        |     |     |
|     | 2        | 3.1       | 3.2                | 3.1                | 0.11                         | 0.49         | 0.52          | 0.39                              | 6.01          | 2.20          | 2.08              | 1.60          |     |                        |     |     |
|     |          | (0.3)     | (0.2) <sub>†</sub> | (0.3) <sup>‡</sup> | (-0.47-0.63)                 | (-0.08-0.82) | (-0.04-0.83)  | (0.06 – 0.73)                     | (4.25-10.20)  | (1.56 – 3.74) | (1.47 – 3.53)     | (1.28 – 2.25) |     |                        |     |     |
|     | 3        | 3.1       | 3.2                | 3.1                | 0.22                         | 0.57         | 0.27          | 0.38                              | 4.05          | 1.88          | 3.49              | 1.61          |     |                        |     |     |
|     |          | (0.3)     | (0.2) <sub>†</sub> | (0.3)              | (-0.38-0.69)                 | (0.03-0.85)  | (-0.33-0.72)  | (0.06 – 0.72)                     | (2.87 - 6.88) | (1.33 – 3.19) | (2.47 – 5.93)     | (1.28 – 2.26) |     |                        |     |     |
|     | 4        | 3.1       | 3.3                | 3.1                | 0.36                         | 0.55         | 0.24          | 0.40                              | 2.86          | 1.97          | 3.83              | 1.60          |     |                        |     |     |
|     |          | (0.3)     | (0.2) <sub>†</sub> | (0.3) <sup>‡</sup> | (-0.24-0.76)                 | (0.00-0.85)  | (-0.36-0.70)  | (0.07 – 0.73)                     | (2.03 – 4.86) | (1.39 – 3.34) | (2.72 – 6.51)     | (1.27 – 2.23) |     |                        |     |     |
|     | 5        | 3.1       | 3.3                | 3.2                | 0.26                         | 0.35         | 0.62          | 0.44                              | 3.61          | 1.72          | 2.91              | 1.54          |     |                        |     |     |
|     |          | (0.2)     | (0.2) <sub>†</sub> | (0.3) <sup>‡</sup> | (-0.34-0.71)                 | (-0.25-0.76) | (0.10-0.87)   | (0.11 – 0.76)                     | (2.56 – 6.13) | (1.22 – 2.92) | (2.06 – 4.95)     | (1.23 – 2.16) |     |                        |     |     |
| RSx | 1        | 2.7       | 2.8                | 2.7                | 0.61                         | 0.76         | 0.68          | 0.67                              | 1.75          | 1.24          | 1.52              | 1.21          |     |                        |     |     |
|     |          | (0.3)     | (0.3)              | (0.3)              | (0.08-0.87)                  | (0.36-0.92)  | (0.20-0.89)   | (0.38 – 0.88)                     | (1.24 – 2.98) | (0.88-2.10)   | (1.08 – 2.58)     | (0.97 – 1.70) |     |                        |     |     |
|     | 2        | 2.6       | 2.8                | 2.7                | 0.82                         | 0.86         | 0.77          | 0.81                              | 1.04          | 0.89          | 1.22              | 0.94          |     |                        |     |     |
|     |          | (0.3)     | (0.3) <sub>†</sub> | (0.3)              | (0.49-0.94)                  | (0.59-0.96)  | (0.37-0.93)   | (0.61-0.94)                       | (0.74 – 1.77) | (0.63-1.51)   | (0.87 – 2.08)     | (0.74 – 1.31) |     |                        |     |     |
|     | 3        | 2.6       | 2.8                | 2.7                | 0.82                         | 0.63         | 0.72          | 0.79                              | 1.06          | 1.18          | 1.37              | 0.99          |     |                        |     |     |
|     |          | (0.3)     | (0.4) <sub>†</sub> | (0.3)              | (0.48-0.94)                  | (0.12-0.88)  | (0.28-0.91)   | (0.56-0.93)                       | (0.75-1.80)   | (0.83-2.00)   | (0.97 – 2.33)     | (0.79 – 1.39) |     |                        |     |     |

| ACC | Interval | Mean (SD)    |                           |                           | ICC <sub>(3,1)</sub> (95%CI)        |                                     |                      | ICC <sub>(3,1)</sub> mean (95%CI) |                                   |                                   | TE (stzd) (LL/UL)     |                       |     | TE (stzd) mean (LL/UL) |     |     |
|-----|----------|--------------|---------------------------|---------------------------|-------------------------------------|-------------------------------------|----------------------|-----------------------------------|-----------------------------------|-----------------------------------|-----------------------|-----------------------|-----|------------------------|-----|-----|
|     |          | Sn. 1        | Sn. 2                     | Sn. 3                     | 2-1                                 | 3-1                                 | 3-2                  | 2-1                               | 3-1                               | 3-2                               | 2-1                   | 3-1                   | 3-2 | 2-1                    | 3-1 | 3-2 |
| RSy | 4        | 2.6<br>(0.3) | 2.8<br>(0.4) <sub>†</sub> | 2.7<br>(0.2)              | 0.74<br>(0.32-0.92)                 | 0.81<br>(0.46-0.94)                 | 0.64<br>(0.13-0.88)  | 0.73<br>(0.46 – 0.90)             | 1.30<br>(0.92 – 2.21)             | 1.08<br>(0.77 – 1.84)             | 1.65<br>(1.17 – 2.81) | 1.12<br>(0.89 – 1.57) |     |                        |     |     |
|     |          | 2.7<br>(0.3) | 2.8<br>(0.4)              | 2.8<br>(0.3)              | 0.75<br>(0.35-0.92)                 | 0.80<br>(0.45-0.94)                 | 0.68<br>(0.20-0.90)  | 0.74<br>(0.49 – 0.91)             | 1.26<br>(0.89 – 2.14)             | 1.10<br>(0.78 – 1.86)             | 1.51<br>(1.07 – 2.56) | 1.09<br>(0.86 – 1.52) |     |                        |     |     |
|     | 1        | 3.1<br>(0.2) | 3.1<br>(0.4)              | 3.1<br>(0.1)              | 0.28<br>(-0.32-0.72)                | 0.54<br>(-0.02-0.84)                | 0.41<br>(-0.18-0.79) | 0.38<br>(0.05-0.72)               | 3.43<br>(2.43-5.83)               | 2.01<br>(1.42 – 3.41)             | 2.57<br>(1.82-4.37)   | 1.62<br>(1.29-2.27)   |     |                        |     |     |
|     |          | 3.0<br>(0.2) | 3.1<br>(0.3)              | 3.2<br>(0.2)              | 0.54<br>(-0.01-0.84)                | 0.58<br>(0.05-0.60)                 | 0.60<br>(0.07-0.86)  | 0.57<br>(0.25-0.83)               | 1.99<br>(1.41 – 3.38)             | 1.84<br>(1.30-3.12)               | 1.79<br>(1.27 – 3.05) | 1.37<br>(1.09 – 1.92) |     |                        |     |     |
|     | 3        | 3.0<br>(0.3) | 3.0<br>(0.4)              | 3.2<br>(0.2)              | 0.63<br>(0.12-0.88)                 | 0.56<br>(0.01-0.85)                 | 0.60<br>(0.07-0.86)  | 0.60<br>(0.29 – 0.84)             | 1.68<br>(1.19 – 2.85)             | 1.94<br>(1.37 - 3.29)             | 1.79<br>(1.27 - 3.04) | 1.33<br>(1.06 – 1.86) |     |                        |     |     |
|     |          | 3.0<br>(0.3) | 3.0<br>(0.4)              | 3.2<br>(0.2) <sub>†</sub> | 0.68<br>(0.20-0.90)                 | 0.63<br>(0.11-0.88)                 | 0.52<br>(-0.05-0.83) | 0.61<br>(0.30-0.85)               | 1.51<br>(1.07 – 2.56)             | 1.69<br>(1.20 – 2.87)             | 2.10<br>(1.48-3.56)   | 1.31<br>(1.04 – 1.84) |     |                        |     |     |
| RSz | 5        | 3.0<br>(0.3) | 3.1<br>(0.4)              | 3.2<br>(0.2) <sub>†</sub> | 0.67<br>(0.19-0.89)                 | 0.71<br>(0.26-0.91)                 | 0.66<br>(0.16-0.89)  | 0.67<br>(0.39-0.88)               | 1.54<br>(1.09-2.61)               | 1.41<br>(1.00-2.40)               | 1.59<br>(1.12-2.70)   | 1.21<br>(0.96 – 1.70) |     |                        |     |     |
|     |          | 3.0<br>(0.3) | 3.1<br>(0.3)              | 3.0<br>(0.3)              | 0.01<br>(-0.55-0.56)                | <b>-0.06</b><br><b>(-0.60-0.51)</b> | 0.82<br>(0.49-0.94)  | 0.27<br>(-0.04-0.64)              | 29.35<br>(20.79-49.83)            | <b>0.59</b><br><b>(0.42-1.00)</b> | 0.66<br>(0.54-0.86)   | 1.74<br>(1.39 - 2.44) |     |                        |     |     |
|     | 2        | 3.0<br>(0.3) | 3.1<br>(0.3)              | 3.0<br>(0.3)              | 0.05<br>(-0.51-0.59)                | 0.03<br>(-0.53-0.57)                | 0.78<br>(0.39-0.93)  | 0.30<br>(-0.01-0.67)              | 8.89<br>(6.30-15.09)              | 11.74<br>(8.32-19.93)             | 1.19<br>(0.84-2.01)   | 1.70<br>(1.36-2.39)   |     |                        |     |     |
|     |          | 3.0<br>(0.3) | 3.1<br>(0.3)              | 3.1<br>(0.2)              | 0.03<br>(-0.53-0.57)                | 0.04<br>(-0.52-0.58)                | 0.76<br>(-0.52-0.58) | 0.28<br>(-0.04-0.65)              | 12.92<br>(9.15-21.93)             | 9.95<br>(7.05-16.90)              | 1.25<br>(0.89-2.13)   | 1.73<br>(1.38-2.43)   |     |                        |     |     |
|     | 4        | 3.1<br>(0.3) | 3.1<br>(0.3)              | 3.1<br>(0.2)              | <b>-0.03</b><br><b>(-0.58-0.53)</b> | 0.01<br>(-0.54-0.56)                | 0.57<br>(0.02-0.85)  | 0.15<br>(-0.13-0.55)              | <b>0.58</b><br><b>(0.41-0.98)</b> | 19.49<br>(13.81-33.09)            | 1.91<br>(1.35-3.24)   | 1.86<br>(1.48-2.60)   |     |                        |     |     |
|     |          | 3.1<br>(0.3) | 3.1<br>(0.3)              | 3.1<br>(0.2)              | 0.07<br>(-0.50-0.60)                | 0.07<br>(-0.50-0.60)                | 0.52<br>(-0.04-0.84) | 0.20<br>(-0.10-0.59)              | 7.77<br>(5.51-13.20)              | 7.67<br>(5.43-13.01)              | 2.07<br>(1.46-3.51)   | 1.81<br>(1.44-2.54)   |     |                        |     |     |

ACC = acceleration, LSx = left shank longitudinal direction, LSy = left shank medio-lateral, LSz = left shank anterior-posterior, RSx = right shank longitudinal, RSy = right shank acceleration direction, RSz = right shank anterior-posterior, Sn = session; SD = standard deviation; ICC = intraclass correlation coefficient; CI = confidence interval; TE (stzd) = standardized typical error; LL = lower limit; UL = upper limit.

† < 0.05 vs. Sn. 1; ‡ < 0.05 vs. Sn. 2.

**Note: Bolded is when raw data was used**

**Table S14.** Reliability of the LyE for neck angular kinematics

| Kin | Interval | Mean (SD)                 |                           |                           | ICC <sub>(3,1)</sub> (95%CI)         |                                      |                        | ICC <sub>(3,1)</sub> mean (95%CI) |                                    | TE (stzd) (LL/UL)                  |                        |                       | TE (stzd) mean (LL/UL) |
|-----|----------|---------------------------|---------------------------|---------------------------|--------------------------------------|--------------------------------------|------------------------|-----------------------------------|------------------------------------|------------------------------------|------------------------|-----------------------|------------------------|
|     |          | Sn. 1                     | Sn. 2                     | Sn. 3                     | 2-1                                  | 3-1                                  | 3-2                    |                                   | 2-1                                | 3-1                                | 3-2                    |                       |                        |
| Nx  | 1        | 2.5<br>(0.4)              | 2.5<br>(0.4)              | 2.5<br>(0.5)              | 0.19<br>(-0.40-0.67)                 | 0.37<br>(-0.23-0.77)                 | 0.64<br>(-0.23-0.77)   | 0.41<br>(0.09 – 0.74)             | 4.34<br>(3.07 – 7.37)              | 2.81<br>(1.99 – 4.78)              | 1.64<br>(1.16 – 2.79)  | 1.58<br>(1.26 – 2.21) |                        |
|     | 2        | 2.5<br>(0.5)              | 2.5<br>(0.5)              | 2.4<br>(0.4)              | 0.31<br>(-0.29-0.74)                 | 0.22<br>(-0.38-0.69)                 | 0.84<br>(0.53 – 0.95)  | 0.46<br>(0.13 – 0.77)             | 3.18<br>(2.25 – 5.40)              | 4.00<br>(2.83 – 6.79)              | 0.98<br>(0.70 – 1.67)  | 1.52<br>(1.21 – 2.13) |                        |
|     | 3        | 2.4<br>(0.5)              | 2.6<br>(0.4)              | 2.4<br>(0.7)              | 0.39<br>(-0.21-0.78)                 | <b>-0.09</b><br><b>(-0.61-0.49)*</b> | 0.53<br>(-0.03-0.84)   | 0.25<br>(-0.05-0.63)              | 2.69<br>(1.91 – 4.57)              | <b>1.19</b><br><b>(0.84-2.02)*</b> | 2.05<br>(1.45 – 3.47)  | 1.76<br>(1.40 – 2.46) |                        |
|     | 4        | 2.6<br>(0.3)              | 2.5<br>(0.4)              | 2.6<br>(0.4)              | 0.99<br>(0.98 – 1.00)                | 0.44<br>(-0.22-0.80)                 | 1.00<br>(0.99 – 1.00)  | 0.99<br>(0.98 – 1.00)             | 0.18<br>(0.12 – 0.31)              | 0.14<br>(0.10 – 0.24)              | 2.44<br>(1.70 – 4.28)  | 0.18<br>(0.15 – 0.25) |                        |
|     | 5        | 2.7<br>(0.4) <sub>c</sub> | 2.7<br>(0.4)              | 2.6<br>(0.5) <sub>c</sub> | 0.57<br>(0.02 – 0.85)                | 0.51<br>(-0.06-0.83)                 | 0.92<br>(0.75 – 0.98)  | 0.68<br>(0.40 – 0.88)             | 1.90<br>(1.35 – 3.23)              | 2.12<br>(1.50 – 3.59)              | 0.66<br>(0.47 – 1.13)  | 1.20<br>(0.95 – 1.68) |                        |
| Ny  | 1        | 1.8<br>(0.9)              | 2.0<br>(0.8)              | 2.1<br>(0.9)              | <b>-0.08</b><br><b>(-0.60-0.50)*</b> | 0.54<br>(-0.01-0.84)                 | 0.01<br>(-0.54-0.56)   | 0.18<br>(-0.11-0.57)              | <b>1.79</b><br><b>(1.27-3.04)*</b> | 1.99<br>(1.41 – 3.39)              | 18.99<br>(13.38-32.07) | 0.87<br>(0.76-1.03)   |                        |
|     | 2        | 2.0<br>(0.8)              | 1.8<br>(0.9)              | 1.9<br>(0.8)              | 0.65<br>(0.16 – 0.89)                | 0.87<br>(0.61 – 0.96)                | 0.79<br>(0.42 – 0.93)  | 0.77<br>(0.53 – 0.92)             | 1.60<br>(1.13 – 2.71)              | 0.87<br>(0.61 – 1.47)              | 1.14<br>(0.81 – 1.94)  | 1.04<br>(0.83 – 1.46) |                        |
|     | 3        | 2.1<br>(0.8)              | 1.9<br>(0.9)              | 2.1<br>(0.7)              | 0.76<br>(0.35 – 0.92)                | 0.90<br>(0.68 – 0.97)                | 0.87<br>(0.60 – 0.96)  | 0.84<br>(0.65 – 0.94)             | 1.25<br>(0.89 – 2.12)              | 0.76<br>(0.54 – 1.30)              | 0.88<br>(0.62 – 1.49)  | 0.88<br>(0.70 – 1.23) |                        |
|     | 4        | 2.2<br>(0.8)              | 2.0<br>(0.8)              | 2.1<br>(0.8)              | 0.78<br>(0.41 – 0.93)                | 0.95<br>(0.83 – 0.99)                | 0.87<br>(0.61 – 0.96)  | 0.87<br>(0.71 – 0.96)             | 1.17<br>(0.83 – 1.98)              | 0.52<br>(0.37 – 0.88)              | 0.86<br>(0.61 – 1.46)  | 0.79<br>(0.63 – 1.11) |                        |
|     | 5        | 2.3<br>(0.9) <sub>a</sub> | 2.2<br>(0.6) <sub>b</sub> | 2.2<br>(0.8)              | 0.30<br>(-0.30-0.73)                 | 0.95<br>(0.83 – 0.98)                | 0.49<br>(-0.08-0.82)   | 0.64<br>(0.34 – 0.86)             | 3.27<br>(2.31 – 5.55)              | 0.53<br>(0.38 – 0.90)              | 2.21<br>(1.56 – 3.74)  | 1.27<br>(1.01 – 1.78) |                        |
| Nz  | 1        | 0.3<br>(0.6)              | 0.1<br>(1.5)              | 0.2<br>(0.6)              | 0.51<br>(-0.06-0.83)                 | 0.34<br>(-0.26-0.75)                 | 0.49<br>(-0.09-0.82)   | 0.43<br>(0.10 – 0.75)             | 2.14<br>(1.52 – 3.64)              | 2.22<br>(1.57 – 3.76)              | 2.96<br>(2.10 – 5.03)  | 1.55<br>(1.24 – 2.18) |                        |
|     | 2        | 0.6<br>(1.0)              | 0.8<br>(1.2) <sub>a</sub> | 0.2<br>(0.6) <sub>‡</sub> | 0.85<br>(0.57 – 0.96)                | 0.65<br>(0.15 – 0.88)                | 0.46<br>(-0.13 – 0.81) | 0.68<br>(0.39 – 0.88)             | 0.92<br>(0.65 – 1.57)              | 1.62<br>(1.15 – 2.75)              | 2.36<br>(1.67 – 4.00)  | 1.20<br>(0.96 – 1.68) |                        |
|     | 3        | 0.9<br>(1.2) <sub>a</sub> | 0.6<br>(1.2) <sub>a</sub> | 0.4<br>(0.9)              | 0.83<br>(0.51 – 0.95)                | 0.55<br>(-0.01-0.84)                 | 0.73<br>(0.30 – 0.91)  | 0.72<br>(0.44 – 0.90)             | 1.01<br>(0.72 – 1.72)              | 1.98<br>(1.40 – 3.37)              | 1.34<br>(0.95 – 2.28)  | 1.14<br>(0.91 – 1.60) |                        |
|     | 4        | 0.9<br>(1.2) <sub>a</sub> | 0.8<br>(1.2) <sub>a</sub> | 0.5<br>(0.9)              | 0.69<br>(0.22 – 0.90)                | 0.79<br>(0.41 – 0.93)                | 0.58<br>(0.05 – 0.86)  | 0.69<br>(0.41 – 0.88)             | 1.47<br>(1.04 – 2.50)              | 1.15<br>(0.82 – 1.96)              | 1.84<br>(1.30 – 3.12)  | 1.19<br>(0.95 – 1.66) |                        |
|     | 5        | 0.5<br>(1.1)              | 0.9<br>(1.2) <sub>a</sub> | 0.5<br>(0.9)              | 0.87<br>(0.61 – 0.96)                | 0.91<br>(0.72 – 0.97)                | 0.84<br>(0.54 – 0.95)  | 0.87<br>(0.71 – 0.96)             | 0.86<br>(0.61 – 1.46)              | 0.71<br>(0.50 – 1.20)              | 0.97<br>(0.68 – 1.64)  | 0.79<br>(0.63 – 1.10) |                        |

Kin = Kinematics, Nx = neck flexion, Ny = neck lateral flexion, Nz = neck rotation, Sn = session; SD = standard deviation; ICC = intraclass correlation coefficient; CI = confidence interval; TE (stzd) = standardized typical error; LL = lower limit; UL = upper limit.

† < 0.05 vs. Sn. 1; ‡ < 0.05 vs. Sn. 2. a < 0.05 vs interval 1; b < 0.05 vs. interval 2; c < 0.05 vs. interval 3

**Note: bolded\* = raw data used to calculate typical error**



**Table S15.** Reliability of the LyE for thorax angular kinematics

| Kin | Interval | Mean (SD)                 |                           |                           | ICC <sub>(3,1)</sub> (95%CI)         |                                      | ICC <sub>(3,1)</sub> mean (95%CI)    |                         | TE (stzd) (LL/UL)                  |                                    |                                    | TE (stzd) mean (LL/UL) |  |
|-----|----------|---------------------------|---------------------------|---------------------------|--------------------------------------|--------------------------------------|--------------------------------------|-------------------------|------------------------------------|------------------------------------|------------------------------------|------------------------|--|
|     |          | Sn. 1                     | Sn. 2                     | Sn. 3                     | 2-1                                  | 3-1                                  | 3-2                                  |                         | 2-1                                | 3-1                                | 3-2                                |                        |  |
| Tx  | 1        | 2.6<br>(0.5)              | 2.5<br>(0.9)              | 2.8<br>(0.2)              | 0.33<br>(-0.27-0.75)                 | 0.07<br>(-0.50-0.60)                 | 0.19<br>(-0.40-0.67)                 | 0.24<br>(-0.06-0.62)    | 1.40<br>(1.14-1.81)                | 1.40<br>(1.14-1.81)                | 0.97<br>(0.79-1.25)                | 1.05<br>(0.92-1.25)    |  |
|     | 2        | 2.7<br>(0.6)              | 2.3<br>(0.8)              | 2.4<br>(0.8)              | 0.53<br>(-0.03-0.84)                 | 0.12<br>(-0.47-0.63)                 | 0.32<br>(-0.28-0.74)                 | 0.33<br>(0.01 – 0.69)   | 2.05<br>(1.45 – 3.48)              | 5.84<br>(4.14 – 9.92)              | 3.10<br>(2.19 – 5.26)              | 1.67<br>(1.33 – 2.34)  |  |
|     | 3        | 2.7<br>(0.6)              | 2.4<br>(0.8)              | 2.5<br>(0.9)              | 0.42<br>(-0.17-0.79)                 | 0.16<br>(-0.43-0.66)                 | 0.10<br>(-0.48-0.62)                 | 0.21<br>(-0.08-0.60)    | 2.54<br>(1.80 – 4.31)              | 4.85<br>(3.43 – 8.23)              | 6.37<br>(4.51-10.81)               | 1.80<br>(1.43 – 2.52)  |  |
|     | 4        | 2.7<br>(0.5)              | 2.5<br>(0.8)              | 2.6<br>(0.6)              | 0.31<br>(-0.29-0.74)                 | 0.09 (-0.48-<br>0.61)                | 0.27<br>(-0.34-0.71)                 | 0.25<br>(-0.06-0.63)    | 3.19<br>(2.26 – 5.42)              | 6.59<br>(4.67 – 11.20)             | 3.55<br>(2.51 – 6.03)              | 1.76<br>(1.40 – 2.47)  |  |
|     | 5        | 2.9<br>(0.5)              | 2.6<br>(0.7)              | 2.7<br>(0.4)              | 0.10<br>(-0.48-0.62)                 | <b>-0.22</b><br><b>(-0.69-0.38)*</b> | 0.11<br>(-0.47-0.62)                 | 0.03<br>(-0.21-0.43)    | 6.31<br>(4.47 – 10.72)             | <b>1.02</b><br><b>(0.72-1.74)*</b> | 6.12<br>(4.33-10.39)               | 1.97<br>(1.57 – 2.77)  |  |
| Ty  | 1        | 2.5<br>(0.4)              | 2.9<br>(0.3) <sub>†</sub> | 2.9<br>(0.3)              | <b>-0.08</b><br><b>(-0.61-0.49)*</b> | 0.52<br>(-0.05-0.83)                 | <b>-0.26</b><br><b>(-0.71-0.34)*</b> | 0.11<br>(-0.16-0.51)    | <b>0.68</b><br><b>(0.48-1.16)*</b> | 2.10<br>(1.49 – 3.57)              | <b>0.65</b><br><b>(0.46-1.10)*</b> | 1.90<br>(1.51 – 2.66)  |  |
|     | 2        | 2.6<br>(0.5)              | 2.8<br>(0.3)              | 2.8<br>(0.4)              | 0.31<br>(-0.30-0.74)                 | 0.30<br>(-0.30-0.73)                 | 0.39<br>(-0.20-0.78)                 | 0.33<br>(0.01 – 0.69)   | 3.22<br>(2.28 – 5.47)              | 3.26<br>(2.31 – 5.53)              | 2.68<br>(1.90 – 4.55)              | 1.68<br>(1.34 – 2.35)  |  |
|     | 3        | 2.7<br>(0.4)              | 2.9<br>(0.3)              | 2.9<br>(0.4)              | 0.37<br>(-0.23-0.76)                 | 0.60<br>(0.08 – 0.87)                | 0.51<br>(-0.06-0.83)                 | 0.50<br>(0.17 – 0.79)   | 2.83<br>(2.01 – 4.81)              | 1.77<br>(1.25 – 3.01)              | 2.14<br>(1.51 – 3.63)              | 1.47<br>(1.17 – 2.06)  |  |
|     | 4        | 2.7<br>(0.4)              | 2.9<br>(0.3) <sub>†</sub> | 2.9<br>(0.3) <sub>†</sub> | 0.25<br>(-0.35-0.70)                 | 0.49<br>(-0.08-0.82)                 | 0.74<br>(0.32 – 0.92)                | 0.49<br>(0.17 – 0.79)   | 3.73<br>(2.64 – 6.33)              | 2.19<br>(1.55 – 3.72)              | 1.30<br>(0.92 – 2.20)              | 1.48<br>(1.18 – 2.07)  |  |
|     | 5        | 2.8<br>(0.4) <sub>a</sub> | 3.0<br>(0.3) <sub>b</sub> | 2.9<br>(0.4)              | 0.57<br>(0.03 – 0.85)                | 0.45<br>(-0.14-0.80)                 | 0.61<br>(0.08 – 0.87)                | 0.54<br>(0.21 – 0.81)   | 1.89<br>(1.34 – 3.21)              | 2.39<br>(1.69 – 4.06)              | 1.75<br>(1.24 – 2.97)              | 1.42<br>(1.13 – 1.99)  |  |
| Tz  | 1        | -0.1<br>(0.0)             | -0.1<br>(0.0)             | -0.1<br>(0.0)             | 0.62<br>(0.11 – 0.87)                | 0.12<br>(-0.46-0.63)                 | 0.17<br>(-0.43-0.66)                 | 0.32<br>(0.00 – 0.68)   | 1.70<br>(1.21 – 2.89)              | 5.71<br>(4.04 – 9.69)              | 4.77<br>(3.38 – 8.10)              | 1.68<br>(1.34 – 2.36)  |  |
|     | 2        | -0.1<br>(0.1)             | 0.2<br>(0.8)              | -0.1<br>(0.0)             | <b>-0.06</b><br><b>(-0.60-0.51)*</b> | 0.58<br>(0.04 – 0.86)                | <b>0.00</b><br><b>(-0.55-0.55)*</b>  | -0.03<br>(-0.24-0.36)   | <b>1.15</b><br><b>(0.81-1.95)*</b> | 1.85<br>(1.31 – 3.15)              | <b>1.85</b><br><b>(1.31-3.15)*</b> | 2.03<br>(1.61 – 2.84)  |  |
|     | 3        | -0.1<br>(0.0)             | 0.2<br>(0.8)              | -0.1<br>(0.0)             | <b>-0.01</b><br><b>(-0.56-0.55)*</b> | 0.26<br>(-0.35-0.71)                 | <b>-0.03</b><br><b>(0.58-0.53)*</b>  | -0.02<br>(-0.24-0.37)   | <b>1.16</b><br><b>(0.82-1.97)*</b> | 3.63<br>(2.57 – 6.17)              | <b>1.17</b><br><b>(0.83-1.99)*</b> | 2.02<br>(1.61 – 2.83)  |  |
|     | 4        | -0.1<br>(0.1)             | 0.2<br>(0.8)              | -0.1<br>(0.0)             | <b>-0.08</b><br><b>(-0.60-0.50)*</b> | <b>-0.05</b><br><b>(-0.59-0.52)*</b> | 0.02<br>(-0.54-0.57)                 | -0.03<br>(-0.24 – 0.36) | <b>1.24</b><br><b>(0.88-2.11)*</b> | <b>0.09</b><br><b>(0.07-0.16)*</b> | 13.66<br>(9.68 – 23.19)            | 2.02<br>(1.61 – 2.83)  |  |
|     | 5        | -0.1<br>(0.0)             | 0.2<br>(0.9)              | -0.1<br>(0.0)             | 0.01<br>(-0.55-0.56)                 | <b>-0.03</b><br><b>(-0.57-0.53)*</b> | <b>-0.04</b><br><b>(-0.58-0.53)*</b> | -0.01<br>(-0.23-0.38)   | 20.94<br>(14.84-35.56)             | <b>0.08</b><br><b>(0.05-0.13)*</b> | <b>1.29</b><br><b>(0.91-2.19)*</b> | 2.01<br>(1.60 – 2.82)  |  |

Kin = Kinematics, Tx = spinal flexion, Ty = spinal lateral flexion, Tz = thorax rotation, Sn = session; SD = standard deviation; ICC = intraclass correlation coefficient; CI = confidence

interval; TE (stzd) = standardized typical error; LL = lower limit; UL = upper limit.

† < 0.05 vs. Sn. 1; ‡ < 0.05 vs. Sn. 2. a < 0.05 vs interval 1; b < 0.05 vs. interval 2

**Note: bolded\* = raw data used to calculate typical error**

**Table S16.** Reliability of the LyE for pelvis angular kinematics

| Kin | Interval | Mean (SD)                  |                            |                            | ICC <sub>(3,1)</sub> (95%CI)         |                                     | ICC <sub>(3,1)</sub> mean (95%CI)   |                       | TE (stdz) (LL/UL)                  |                                    |                                    | TE (stdz) mean (LL/UL) |  |
|-----|----------|----------------------------|----------------------------|----------------------------|--------------------------------------|-------------------------------------|-------------------------------------|-----------------------|------------------------------------|------------------------------------|------------------------------------|------------------------|--|
|     |          | Sn. 1                      | Sn. 2                      | Sn. 3                      | 2-1                                  | 3-1                                 | 3-2                                 |                       | 2-1                                | 3-1                                | 3-2                                |                        |  |
| Px  | 1        | -0.1<br>(0.0)              | -0.1<br>(0.0)              | -0.1<br>(0.0)              | 0.06<br>(-0.51-0.59)                 | 0.39<br>(-0.21-0.77)                | 0.63<br>(0.12 – 0.88)               | 0.34<br>(0.02 – 0.70) | 8.25<br>(5.85-14.01)               | 2.71<br>(1.92 – 4.60)              | 1.67<br>(1.18 – 2.83)              | 1.66<br>(1.32 – 2.32)  |  |
|     | 2        | -0.1<br>(0.0)              | -0.1<br>(0.0)              | -0.1<br>(0.0)              | 0.72<br>(0.27 – 0.91)                | 0.64<br>(0.14 – 0.88)               | 0.44<br>(-0.15–0.80)                | 0.61<br>(0.30 – 0.85) | 1.39<br>(0.98 – 2.36)              | 1.64<br>(1.16 – 2.78)              | 2.46<br>(1.74 – 4.17)              | 1.32<br>(1.05 – 1.85)  |  |
|     | 3        | -0.1<br>(0.0) <sub>a</sub> | -0.1<br>(0.0)              | -0.1<br>(0.0) <sub>†</sub> | 0.34<br>(-0.26-0.75)                 | 0.56<br>(0.01 – 0.85)               | 0.26<br>(-0.35-0.71)                | 0.41<br>(0.08 – 0.74) | 2.96<br>(2.10 – 5.03)              | 1.93<br>(1.36 – 3.27)              | 3.65<br>(2.59 – 6.20)              | 1.59<br>(1.26 – 2.22)  |  |
|     | 4        | -0.1<br>(0.0)              | -0.1<br>(0.0)              | -0.1<br>(0.0) <sub>b</sub> | 0.42<br>(-0.17-0.79)                 | 0.43<br>(-0.16-0.79)                | 0.53<br>(-0.03-0.84)                | 0.47<br>(0.14 – 0.77) | 2.53<br>(1.79 – 4.29)              | 2.49<br>(1.77 – 4.23)              | 2.05<br>(1.45 – 3.48)              | 1.51<br>(1.20 – 2.12)  |  |
|     | 5        | -0.1<br>(0.0)              | -0.1<br>(0.0)              | -0.1<br>(0.0)              | 0.51<br>(-0.05-0.83)                 | 0.18<br>(-0.42-0.66)                | 0.60<br>(0.07 – 0.86)               | 0.44<br>(0.11 – 0.76) | 2.11<br>(1.49 – 3.58)              | 4.61<br>(3.26 – 7.82)              | 1.80<br>(1.27 – 3.05)              | 1.54<br>(1.23 – 2.16)  |  |
| Py  | 1        | -0.1<br>(0.1)              | -0.1<br>(0.1) <sub>†</sub> | -0.1<br>(0.1) <sub>†</sub> | 0.31<br>(-0.29-0.74)                 | 0.24<br>(-0.36-0.70)                | 0.19<br>(-0.41-0.67)                | 0.25<br>(-0.06-0.63)  | 3.17<br>(2.25 – 5.38)              | 3.75<br>(2.66 – 6.37)              | 4.43<br>(3.14 – 7.53)              | 1.76<br>(1.40 – 2.47)  |  |
|     | 2        | -0.1<br>(0.0)              | -0.1<br>(0.0)              | -0.1<br>(0.1)              | 0.55<br>(-0.01-0.84)                 | 0.58<br>(0.05 – 0.86)               | 0.92<br>(0.75 – 0.98)               | 0.70<br>(0.43 – 0.89) | 1.98<br>(1.40 – 3.37)              | 1.84<br>(1.30 – 3.13)              | 0.66<br>(0.46 – 1.11)              | 1.16<br>(0.92 – 1.63)  |  |
|     | 3        | -0.1<br>(0.0)              | -0.1<br>(0.1)              | -0.1<br>(0.1)              | 0.34<br>(-0.26-0.75)                 | 0.31<br>(-0.29-0.74)                | 0.68<br>(0.20 – 0.90)               | 0.46<br>(0.13 – 0.77) | 2.98<br>(2.11 – 5.05)              | 3.18<br>(2.25 – 5.40)              | 1.51<br>(1.07 – 2.56)              | 1.52<br>(1.21 – 2.13)  |  |
|     | 4        | -0.1<br>(0.0)              | -0.1<br>(0.1)              | -0.1<br>(0.0)              | 0.69<br>(0.22 – 0.90)                | 0.24<br>(-0.35-0.70)                | 0.24<br>(-0.36-0.70)                | 0.41<br>(0.08 – 0.74) | 1.47<br>(1.04 – 2.50)              | 3.79<br>(2.69 – 6.44)              | 3.77<br>(2.67 – 6.41)              | 1.59<br>(1.26 – 2.22)  |  |
|     | 5        | -0.1<br>(0.1) <sub>a</sub> | -0.1<br>(0.0)              | -0.1<br>(0.0)              | 0.47<br>(-0.11-0.81)                 | 0.57<br>(0.03 – 0.85)               | 0.46<br>(-0.12-0.81)                | 0.51<br>(0.18 – 0.80) | 2.29<br>(1.63 – 3.90)              | 1.89<br>(1.34 – 3.20)              | 2.32<br>(1.64 – 3.94)              | 1.46<br>(1.16 – 2.05)  |  |
| Pz  | 1        | -0.1<br>(0.0)              | 0.3<br>(1.0)               | -0.1<br>(0.0)              | <b>0.00</b><br><b>(-0.56-0.55)*</b>  | 0.02<br>(-0.54-0.56)                | 0.21<br>(-0.39-0.68)                | 0.10<br>(-0.16-0.50)  | <b>1.42</b><br><b>(1.00-2.41)*</b> | 17.01<br>(12.05-28.87)             | 4.13<br>(2.92 – 7.01)              | 1.90<br>(1.52 – 2.67)  |  |
|     | 2        | -0.1<br>(0.0)              | 0.2<br>(1.0)               | -0.1<br>(0.1)              | <b>-0.01</b><br><b>(-0.56-0.55)*</b> | <b>-0.05</b><br><b>(-0.58-0.52)</b> | 0.20<br>(-0.39-0.68)                | 0.10<br>(-0.16-0.50)  | <b>1.35</b><br><b>(0.96-2.30)*</b> | <b>0.14</b><br><b>(0.10-0.24)*</b> | 4.22<br>(2.99-7.17)                | 1.91<br>(1.52 – 2.68)  |  |
|     | 3        | -0.1<br>(0.0)              | 0.2<br>(1.0)               | -0.1<br>(0.0)              | <b>-0.02</b><br><b>(-0.57-0.54)*</b> | <b>-0.21</b><br><b>(-0.68-0.39)</b> | 0.03<br>(-0.53-0.57)                | 0.00<br>(-0.22-0.40)  | <b>1.45</b><br><b>(1.03-2.46)*</b> | <b>0.07</b><br><b>(0.05-0.13)*</b> | 12.60<br>(8.93-21.40)              | 2.00<br>(1.59 – 2.80)  |  |
|     | 4        | -0.1<br>(0.0)              | 0.2<br>(1.0)               | -0.1<br>(0.1)              | <b>-0.02</b><br><b>(-0.57-0.54)*</b> | 0.02<br>(-0.54-0.56)                | 0.03<br>(-0.53-0.57)                | 0.00<br>(-0.22-0.39)  | <b>1.49</b><br><b>(1.05-2.52)*</b> | 16.30<br>(11.54-27.67)             | 12.89<br>(9.13-21.88)              | 2.00<br>(1.59-2.80)    |  |
|     | 5        | -0.1<br>(0.0)              | 0.3<br>(1.0)               | -0.1<br>(0.0)              | 0.00<br>(-0.55-0.56)                 | 0.36<br>(-0.24-0.76)                | <b>0.00</b><br><b>(-0.55-0.55)*</b> | 0.00<br>(-0.22-0.39)  | 31.76<br>(22.50 -53.93)            | 2.86<br>(2.03 – 4.86)              | <b>1.48</b><br><b>(1.05-2.51)*</b> | 2.00<br>(1.59 – 2.80)  |  |

Px = pelvic tilt, Py = pelvic obliquity, Pz = pelvic rotation, Sn = session; SD = standard deviation; ICC = intraclass correlation coefficient; CI = confidence interval; TE (stdz) = standardized typical error; LL = lower limit; UL = upper limit.

† < 0.05 vs. Sn. 1; ‡ < 0.05 vs. Sn. 2. a < 0.05 vs interval 1; b < 0.05 vs. interval 2

**Note: bolded\* = raw data used to calculate typical error**

**Table S17.** Reliability of the LyE for left and right hip kinematics

| Kin | Interval | Mean (SD)    |                           |                           | ICC <sub>(3,1)</sub> (95%CI)         |                       |                                      | ICC <sub>(3,1)</sub> mean (95%CI) |                                      |                       | TE (stzd) (LL/UL)                  |                       |     | TE (stzd) mean (LL/UL) |     |     |
|-----|----------|--------------|---------------------------|---------------------------|--------------------------------------|-----------------------|--------------------------------------|-----------------------------------|--------------------------------------|-----------------------|------------------------------------|-----------------------|-----|------------------------|-----|-----|
|     |          | Sn. 1        | Sn. 2                     | Sn. 3                     | 2-1                                  | 3-1                   | 3-2                                  | 2-1                               | 3-1                                  | 3-2                   | 2-1                                | 3-1                   | 3-2 | 2-1                    | 3-1 | 3-2 |
| LHx | 1        | 2.5<br>(0.4) | 2.4<br>(0.6)              | 2.3<br>(0.6)              | 0.61<br>(0.09 – 0.87)                | 0.65<br>(0.16 – 0.89) | 0.25<br>(-0.35-0.71)                 | 0.49<br>(0.16 – 0.78)             | 1.74<br>(1.23 – 2.95)                | 1.60<br>(1.13 – 2.71) | 3.69<br>(2.62 – 6.27)              | 1.49<br>(1.18 – 2.08) |     |                        |     |     |
|     | 2        | 2.3<br>(0.4) | 2.3<br>(0.4)              | 2.1<br>(0.7)              | 0.56<br>(0.02 – 0.85)                | 0.48<br>(-0.10-0.81)  | 0.17<br>(-0.43-0.66)                 | 0.37<br>(0.05 – 0.72)             | 1.91<br>(1.35-3.25)                  | 2.27<br>(1.61-3.86)   | 4.76<br>(3.37 – 8.08)              | 1.63<br>(1.29 – 2.28) |     |                        |     |     |
|     | 3        | 2.5<br>(0.4) | 2.3<br>(0.5)              | 2.2<br>(0.6)              | 0.67<br>(0.18 – 0.89)                | 0.36<br>(-0.24-0.76)  | 0.26<br>(-0.35-0.71)                 | 0.40<br>(0.07 - 0.73)             | 1.55<br>(1.10 – 2.64)                | 2.84<br>(2.01 – 4.82) | 3.64<br>(2.58 – 6.18)              | 1.59<br>(1.27 – 2.23) |     |                        |     |     |
|     | 4        | 2.5<br>(0.4) | 2.3<br>(0.5)              | 2.2<br>(0.4)              | 0.56<br>(0.01 – 0.85)                | 0.30<br>(-0.30-0.73)  | 0.54<br>(-0.03-0.84)                 | 0.48<br>(0.15 – 0.78)             | 1.93<br>(1.37 – 3.27)                | 3.28<br>(2.33 – 5.57) | 2.03<br>(1.44 – 3.44)              | 1.50<br>(1.20 – 2.10) |     |                        |     |     |
|     | 5        | 2.5<br>(0.4) | 2.2<br>(0.5)              | 2.3<br>(0.4)              | 0.68<br>(0.20 – 0.90)                | 0.75<br>(0.34 – 0.92) | 0.79<br>(0.42 – 0.94)                | 0.74<br>(0.49 – 0.91)             | 1.51<br>(1.07 – 2.56)                | 1.27<br>(0.90 – 2.16) | 1.14<br>(0.81 – 1.93)              | 1.09<br>(0.87 – 1.53) |     |                        |     |     |
| LHy | 1        | 2.7<br>(0.5) | 2.6<br>(0.5)              | 2.6<br>(0.5)              | 0.72<br>(0.53-0.85)                  | 0.60<br>(0.35-0.77)   | 0.84<br>(0.71-0.91)                  | 0.71<br>(0.57-0.82)               | 1.27<br>(1.03-1.64)                  | 1.68<br>(1.37-2.18)   | 0.91<br>(0.74-1.17)                | 1.10<br>(0.96-1.30)   |     |                        |     |     |
|     | 2        | 2.6<br>(0.5) | 2.5<br>(0.5)              | 2.6<br>(0.4)              | 0.69<br>(0.22 – 0.90)                | 0.64<br>(0.13 – 0.88) | 0.54<br>(-0.02-0.84)                 | 0.63<br>(0.32 – 0.86)             | 1.47<br>(1.04 – 2.50)                | 1.64<br>(1.16 – 2.79) | 2.02<br>(1.43 – 3.43)              | 1.29<br>(1.02 – 1.80) |     |                        |     |     |
|     | 3        | 2.6<br>(0.5) | 2.5<br>(0.6)              | 2.6<br>(0.5)              | 0.80<br>(0.45 – 0.94)                | 0.71<br>(0.25 – 0.91) | 0.55<br>(0.00 – 0.85)                | 0.69<br>(0.41 – 0.89)             | 1.11<br>(0.78 – 1.88)                | 1.42<br>(1.01 – 2.41) | 1.95<br>(1.38 – 3.31)              | 1.18<br>(0.94 – 1.65) |     |                        |     |     |
|     | 4        | 2.7<br>(0.5) | 2.5<br>(0.5)              | 2.6<br>(0.4)              | 0.67<br>(0.18)                       | 0.76<br>(0.35 – 0.92) | 0.58<br>(0.04 – 0.86)                | 0.67<br>(0.37 – 0.87)             | 1.55<br>(1.10 – 2.63)                | 1.26<br>(0.89 – 2.13) | 1.86<br>(1.31 – 3.15)              | 1.23<br>(0.98 – 1.72) |     |                        |     |     |
|     | 5        | 2.7<br>(0.5) | 2.6<br>(0.5)              | 2.6<br>(0.5)              | 0.63<br>(0.12 – 0.88)                | 0.73<br>(0.30 – 0.92) | 0.65<br>(0.15 – 0.89)                | 0.67<br>(0.38 – 0.88)             | 1.68<br>(1.19 – 2.85)                | 1.33<br>(0.94 – 2.26) | 1.60<br>(1.13 – 2.72)              | 1.22<br>(0.97 – 1.71) |     |                        |     |     |
| LHz | 1        | 2.3<br>(0.6) | 2.4<br>(0.5)              | 2.4<br>(0.3)              | 0.48<br>(-0.10-0.81)                 | 0.25<br>(-0.35-0.71)  | 0.84<br>(0.52-0.95)                  | 0.50<br>(0.17 – 0.79)             | 2.27<br>(1.61 – 3.86)                | 3.71<br>(2.63 – 6.29) | 0.99<br>(0.70 – 1.68)              | 1.47<br>(1.17 – 2.05) |     |                        |     |     |
|     | 2        | 2.2<br>(0.5) | 2.2<br>(0.4)              | 2.3<br>(0.4)              | 0.47<br>(-0.11-0.81)                 | 0.30<br>(-0.30-0.73)  | 0.87<br>(0.61 – 0.96)                | 0.53<br>(0.21 – 0.81)             | 2.28<br>(1.62 – 3.88)                | 3.25<br>(2.30 – 5.51) | 0.86<br>(0.61 – 1.46)              | 1.43<br>(1.14 – 2.00) |     |                        |     |     |
|     | 3        | 2.1<br>(0.7) | 2.1<br>(0.6) <sub>a</sub> | 2.0<br>(0.6) <sub>a</sub> | 0.78<br>(0.40 – 0.93)                | 0.58<br>(0.04 – 0.86) | 0.64<br>(0.14 – 0.88)                | 0.67<br>(0.38 – 0.88)             | 1.17<br>(0.83 – 1.99)                | 1.85<br>(1.31 – 3.13) | 1.64<br>(1.16 – 2.78)              | 1.22<br>(0.97 – 1.70) |     |                        |     |     |
|     | 4        | 2.2<br>(0.7) | 2.1<br>(0.6)              | 2.3<br>(0.4) <sub>c</sub> | 0.73<br>(0.29 – 0.91)                | 0.56<br>(0.01 – 0.85) | 0.51<br>(-0.06-0.83)                 | 0.62<br>(0.31 – 0.85)             | 1.35<br>(0.95 – 2.29)                | 1.93<br>(1.37 – 3.28) | 2.13<br>(1.51 – 3.61)              | 1.30<br>(1.03 – 1.82) |     |                        |     |     |
|     | 5        | 2.3<br>(0.6) | 2.2<br>(0.6)              | 2.4<br>(0.4) <sub>c</sub> | 0.44<br>(-0.14-0.80)                 | 0.80<br>(0.44 – 0.94) | 0.39<br>(-0.21-0.78)                 | 0.53<br>(0.20 - 0.81)             | 2.41<br>(1.71 – 4.10)                | 1.12<br>(0.79 – 1.90) | 2.68<br>(1.90 – 4.55)              | 1.43<br>(1.14 – 2.01) |     |                        |     |     |
| RHx | 1        | 2.5<br>(0.6) | 2.6<br>(0.9)              | 2.8<br>(0.4)              | <b>-0.09</b><br><b>(-0.61-0.49)*</b> | 0.56<br>(0.01 – 0.85) | 0.08<br>(-0.50-0.60)                 | 0.10<br>(-0.16-0.50)              | <b>1.63</b><br><b>(1.16-2.77)*</b>   | 1.94<br>(1.37 – 3.29) | 7.37<br>(5.22-12.51)               | 1.91<br>(1.52 – 2.68) |     |                        |     |     |
|     | 2        | 2.5<br>(0.3) | 2.5<br>(0.9)              | 2.7<br>(0.3)              | <b>-0.06</b><br><b>(-0.59-0.51)*</b> | 0.83<br>(0.52 – 0.95) | 0.03<br>(-0.53-0.57)                 | 0.08<br>(-0.17-0.48)              | <b>1.36</b><br><b>(0.96-2.31)*</b>   | 1.00<br>(0.71 – 1.69) | 11.85<br>(8.40-20.13)              | 1.92<br>(1.53 – 2.70) |     |                        |     |     |
|     | 3        | 2.6<br>(0.4) | 2.5<br>(0.9)              | 2.8<br>(0.3)              | <b>-0.02</b><br><b>(-0.57-0.54)*</b> | 0.82<br>(0.48-0.94)   | <b>-0.09</b><br><b>(-0.61-0.49)*</b> | 0.05<br>(-0.19-0.45)              | <b>1.37</b><br><b>(0.97 – 2.33)*</b> | 1.05<br>(0.74 – 1.78) | <b>1.39</b><br><b>(0.99-2.36)*</b> | 1.95<br>(1.55 – 2.74) |     |                        |     |     |

| Kin             | Interval | Mean (SD)                  |                           |                            | ICC <sub>(3,1)</sub> (95%CI)         |                        |                        | ICC <sub>(3,1)</sub> mean (95%CI) |                                    |                       | TE (stzd) (LL/UL)     |                       |     | TE (stzd) mean (LL/UL) |     |     |
|-----------------|----------|----------------------------|---------------------------|----------------------------|--------------------------------------|------------------------|------------------------|-----------------------------------|------------------------------------|-----------------------|-----------------------|-----------------------|-----|------------------------|-----|-----|
|                 |          | Sn. 1                      | Sn. 2                     | Sn. 3                      | 2-1                                  | 3-1                    | 3-2                    | 2-1                               | 3-1                                | 3-2                   | 2-1                   | 3-1                   | 3-2 | 2-1                    | 3-1 | 3-2 |
|                 | 4        | 2.7<br>(0.4)               | 2.5<br>(0.9)              | 2.7<br>(0.4)               | <b>-0.27</b><br><b>(-0.71-0.34)*</b> | 0.40<br>(-0.20-0.78)   | 0.05<br>(-0.51-0.59)   | -0.04<br>(-0.25-0.34)             | <b>1.57</b><br><b>(1.11-2.67)*</b> | 2.64<br>(1.87 – 4.49) | 8.93<br>(6.33-15.16)  | 2.04<br>(1.62 – 2.85) |     |                        |     |     |
|                 | 5        | 2.7<br>(0.4)               | 2.5<br>(0.9)              | 2.7<br>(0.4)               | 0.01<br>(-0.54-0.56)                 | 0.86<br>(0.58 – 0.96)  | 0.20<br>(-0.39-0.68)   | 0.23<br>(-0.07-0.61)              | 19.14<br>(13.36-32.50)             | 0.91<br>(0.65 – 1.55) | 4.22<br>(2.99 – 7.17) | 1.78<br>(1.42 – 2.50) |     |                        |     |     |
|                 | 1        | 3.1<br>(0.4)               | 3.2<br>(0.2)              | 3.2<br>(0.2)               | 0.74<br>(0.32 – 0.92)                | 0.54<br>(-0.02-0.84)   | 0.48<br>(-0.10-0.81)   | 0.61<br>(0.30 – 0.85)             | 1.30<br>(0.92 – 2.20)              | 2.01<br>(1.43 – 3.42) | 2.27<br>(1.61 – 3.86) | 1.32<br>(1.05 – 1.84) |     |                        |     |     |
|                 | 2        | 3.0<br>(0.3)               | 3.2<br>(0.3) <sub>†</sub> | 3.1<br>(0.2)               | 0.68<br>(0.20 – 0.90)                | 0.28<br>(-0.32-0.72)   | 0.44<br>(-0.14-0.80)   | 0.49<br>(0.16 – 0.79)             | 1.51<br>(1.07 – 2.56)              | 3.43<br>(2.43 – 5.83) | 2.42<br>(1.71 – 4.10) | 1.48<br>(1.18 – 2.07) |     |                        |     |     |
|                 | 3        | 3.0<br>(0.3)               | 3.2<br>(0.3) <sub>†</sub> | 3.2<br>(0.1) <sub>b†</sub> | 0.88<br>(0.64 – 0.96)                | 0.47<br>(-0.11-0.81)   | 0.51<br>(-0.06-0.83)   | 0.68<br>(0.39 – 0.88)             | 0.82<br>(0.58 – 1.40)              | 2.28<br>(1.62 – 3.87) | 2.11<br>(1.50 – 3.59) | 1.21<br>(0.96 – 1.69) |     |                        |     |     |
| RH <sub>y</sub> | 4        | 3.1<br>(0.3)               | 3.2<br>(0.4) <sub>†</sub> | 3.3<br>(0.2)               | 0.73<br>(0.30 – 0.91)                | 0.30<br>(-0.31-0.73)   | 0.47<br>(-0.12-0.81)   | 0.55<br>(0.23 – 0.82)             | 1.33<br>(0.94 – 2.26)              | 3.30<br>(2.34 – 5.60) | 2.31<br>(1.64 – 3.93) | 1.40<br>(1.11 – 1.96) |     |                        |     |     |
|                 | 5        | 3.2<br>(0.4) <sub>bc</sub> | 3.2<br>(0.3)              | 3.3<br>(0.2)               | 0.84<br>(0.53 – 0.95)                | 0.41<br>(-0.18 – 0.79) | 0.40<br>(-0.20 – 0.78) | 0.61<br>(0.30 – 0.85)             | 0.98<br>(0.70 – 1.67)              | 2.57<br>(1.82 – 4.37) | 2.66<br>(1.88 – 4.51) | 1.31<br>(1.04 – 1.84) |     |                        |     |     |
|                 | 1        | 2.2<br>(0.7)               | 2.0<br>(0.8)              | 2.2<br>(0.6)               | 0.66<br>(0.18 – 0.89)                | 0.61<br>(0.09 – 0.87)  | 0.29<br>(-0.31-0.73)   | 0.52<br>(0.20 – 0.81)             | 1.56<br>(1.10 – 2.65)              | 1.73<br>(1.23 – 2.94) | 3.36<br>(2.38 – 5.70) | 1.44<br>(1.14 – 2.01) |     |                        |     |     |
|                 | 2        | 2.2<br>(0.7)               | 1.9<br>(0.7)              | 2.2<br>(0.6)               | 0.76<br>(0.35 – 0.92)                | 0.61<br>(0.09 – 0.87)  | 0.31<br>(-0.29-0.74)   | 0.57<br>(0.25 – 0.83)             | 1.25<br>(0.89 – 2.13)              | 1.75<br>(1.24 – 2.97) | 3.18<br>(2.25 – 5.40) | 1.38<br>(1.10 – 1.93) |     |                        |     |     |
|                 | 3        | 2.3<br>(0.6)               | 2.1<br>(0.7)              | 2.2<br>(0.8)               | 0.66<br>(0.16 – 0.89)                | 0.71<br>(0.27 – 0.91)  | 0.25<br>(-0.36-0.70)   | 0.53<br>(0.20 – 0.81)             | 1.59<br>(1.13 – 2.70)              | 1.39<br>(0.99 – 2.37) | 3.74<br>(2.65 – 6.35) | 1.44<br>(1.14 – 2.01) |     |                        |     |     |
| RH <sub>z</sub> | 4        | 2.4<br>(0.6)               | 2.2<br>(0.7)              | 2.3<br>(0.7)               | 0.77<br>(0.37 – 0.93)                | 0.70<br>(0.24 – 0.90)  | 0.30<br>(-0.30-0.73)   | 0.58<br>(0.26 – 0.83)             | 1.21<br>(0.86 – 2.06)              | 1.44<br>(1.02 – 2.45) | 3.26<br>(2.31 – 5.53) | 1.36<br>(1.08 – 1.90) |     |                        |     |     |
|                 | 5        | 2.5<br>(0.6)               | 2.1<br>(0.8) <sub>†</sub> | 2.4<br>(0.7)               | 0.35<br>(-0.26-0.76)                 | 0.73<br>(0.29 – 0.91)  | 0.29<br>(-0.31-0.73)   | 0.44<br>(0.11 – 0.76)             | 2.95<br>(2.09 – 5.00)              | 1.35<br>(0.96 – 2.29) | 3.36<br>(2.38 – 5.71) | 1.55<br>(1.23 – 2.17) |     |                        |     |     |

Kin = kinematics LHx = left hip flexion/extension, LHy = left hip abduction/adduction, LHz = left hip rotation, RHx = right hip flexion/extension, RH<sub>y</sub> = right hip abduction/adduction, RH<sub>z</sub> = right hip rotation, Sn = session; SD = standard deviation; ICC = intraclass correlation coefficient; CI = confidence interval; TE (stzd) = standardized typical error; LL = lower limit; UL = upper limit.

† < 0.05 vs. Sn. 1; ‡ < 0.05 vs. Sn. 2

a < 0.05 vs interval 1; b < 0.05 vs. interval 2; c < 0.05 vs. interval 3

**Note: bolded\* = raw data used to calculate typical error**

**Table S18.** Reliability of the LyE for left and right knee kinematics

| Kin | Interval | Mean (SD)                  |                            |                            | ICC <sub>(3,1)</sub> (95%CI) |                                      |                       | ICC <sub>(3,1)</sub> mean (95%CI) |                       |                                    | TE (stzd) (LL/UL)     |                       |     | TE (stzd) mean (LL/UL) |
|-----|----------|----------------------------|----------------------------|----------------------------|------------------------------|--------------------------------------|-----------------------|-----------------------------------|-----------------------|------------------------------------|-----------------------|-----------------------|-----|------------------------|
|     |          | Sn. 1                      | Sn. 2                      | Sn. 3                      | 2-1                          | 3-1                                  | 3-2                   | 2-1                               | 3-1                   | 3-2                                | 2-1                   | 3-1                   | 3-2 |                        |
| LKx | 1        | 1.9<br>(0.5)               | 2.0<br>(0.5)               | 1.8<br>(0.5)               | 0.53<br>(-0.03-0.84)         | 0.83<br>(0.52 – 0.95)                | 0.87<br>(0.61 – 0.96) | 0.75<br>(0.50 – 0.91)             | 2.03<br>(1.44 – 3.45) | 1.00<br>(0.71 – 1.70)              | 0.86<br>(0.61 – 1.47) | 1.07<br>(0.85 – 1.50) |     |                        |
|     | 2        | 1.8<br>(0.5)               | 1.9<br>(0.5)               | 1.7<br>(0.5)               | 0.56<br>(0.01 – 0.85)        | 0.82<br>(0.48 – 0.94)                | 0.88<br>(0.64 – 0.96) | 0.76<br>(0.51 – 0.91)             | 1.94<br>(1.38 – 3.30) | 1.05<br>(0.75 – 1.79)              | 0.82<br>(0.58 – 1.40) | 1.06<br>(0.84 – 1.49) |     |                        |
|     | 3        | 1.9<br>(0.6)               | 1.9<br>(0.5)               | 1.9<br>(0.5)               | 0.44<br>(-0.15-0.80)         | 0.82<br>(0.49 – 0.95)                | 0.79<br>(0.42 – 0.93) | 0.69<br>(0.40 – 0.88)             | 2.46<br>(1.74 – 4.18) | 1.04<br>(0.73 – 1.76)              | 1.15<br>(0.81 – 1.95) | 1.19<br>(0.95 – 1.67) |     |                        |
|     | 4        | 2.0<br>(0.5)               | 2.0<br>(0.5)               | 1.9<br>(0.5)               | 0.42<br>(-0.17-0.79)         | 0.86<br>(0.59 – 0.96)                | 0.80<br>(0.44 – 0.94) | 0.71<br>(0.43 – 0.89)             | 2.51<br>(1.78 – 4.27) | 0.90<br>(0.63 – 1.52)              | 1.11<br>(0.78 – 1.88) | 1.16<br>(0.92 – 1.62) |     |                        |
|     | 5        | 2.1<br>(0.5) <sub>b</sub>  | 2.0<br>(0.6) <sub>†</sub>  | 1.8<br>(0.4) <sub>‡</sub>  | 0.47<br>(-0.11-0.81)         | 0.77<br>(0.38 – 0.93)                | 0.83<br>(0.51 – 0.95) | 0.69<br>(0.40 – 0.88)             | 2.30<br>(1.63 – 3.91) | 1.20<br>(0.85 – 2.04)              | 1.00<br>(0.71 – 1.70) | 1.19<br>(0.95 – 1.67) |     |                        |
| LKy | 1        | 2.2<br>(0.5)               | 2.1<br>(0.5)               | 2.2<br>(0.6)               | 0.23<br>(-0.37-0.69)         | 0.73<br>(0.29-0.91)                  | 0.14<br>(-0.45-0.64)  | 0.38<br>(0.05 – 0.72)             | 3.93<br>(2.79 – 6.68) | 1.36<br>(0.96 – 2.30)              | 5.37<br>(3.80 – 9.12) | 1.62<br>(1.29 – 2.27) |     |                        |
|     | 2        | 2.1<br>(0.5)               | 2.0<br>(0.5)               | 2.1<br>(0.5)               | 0.21<br>(-0.38-0.69)         | 0.71<br>(0.27 – 0.91)                | 0.24<br>(-0.36-0.70)  | 0.40<br>(0.08 – 0.74)             | 4.08<br>(2.89 – 6.93) | 1.39<br>(0.99 – 2.36)              | 3.76<br>(2.66 – 6.38) | 1.59<br>(1.26 – 2.23) |     |                        |
|     | 3        | 2.2<br>(0.5)               | 2.0<br>(0.6)               | 2.1<br>(0.5)               | 0.26<br>(-0.34-0.71)         | 0.64<br>(0.14 – 0.88)                | 0.26<br>(-0.34-0.71)  | 0.37<br>(0.05 – 0.72)             | 3.60<br>(2.55 – 6.11) | 1.64<br>(1.16 – 2.78)              | 3.60<br>(2.55 – 6.11) | 1.63<br>(1.30 – 2.28) |     |                        |
|     | 4        | 2.3<br>(0.5)               | 2.0<br>(0.6)               | 2.1<br>(0.5)               | 0.27<br>(-0.33-0.71)         | 0.58<br>(0.04-0.86)                  | 0.30<br>(-0.30-0.73)  | 0.37<br>(0.05 – 0.72)             | 3.53<br>(2.50 – 6.00) | 1.87<br>(1.32 – 3.17)              | 3.24<br>(2.29 – 5.50) | 1.63<br>(1.30 – 2.28) |     |                        |
|     | 5        | 2.3<br>(0.4)               | 2.1<br>(0.6)               | 2.1<br>(0.6)               | 0.33<br>(-0.27-0.75)         | 0.58<br>(0.04 -0.86)                 | 0.17<br>(-0.42-0.66)  | 0.35<br>(0.03 – 0.70)             | 3.03<br>(2.14 – 5.14) | 1.84<br>(1.31 – 3.13)              | 4.63<br>(3.28 – 7.86) | 1.65<br>(1.31 – 2.31) |     |                        |
| LKz | 1        | 1.4<br>(0.7)               | 1.5<br>(0.8)               | 1.4<br>(0.8)               | 0.29<br>(-0.32-0.72)         | <b>-0.06</b><br><b>(-0.59-0.51)*</b> | 0.39<br>(-0.21-0.78)  | 0.22<br>(-0.08-0.61)              | 3.38<br>(2.39 – 5.73) | <b>1.50</b><br><b>(1.07-2.55)*</b> | 2.68<br>(1.90 – 4.55) | 1.79<br>(1.42 – 2.51) |     |                        |
|     | 2        | 1.3<br>(0.6)               | 1.4<br>(0.8)               | 1.3<br>(0.7)               | 0.27<br>(-0.34-0.71)         | <b>-0.04</b><br><b>(-0.58-0.52)*</b> | 0.37<br>(-0.24-0.76)  | 0.21<br>(-0.09-0.60)              | 3.54<br>(2.51 – 6.01) | <b>1.36</b><br><b>(0.96-2.31)*</b> | 2.83<br>(2.01 – 4.81) | 1.80<br>(1.43 – 2.52) |     |                        |
|     | 3        | 0.9<br>(0.2) <sub>ab</sub> | 1.1<br>(0.4) <sub>a</sub>  | 0.9<br>(0.3) <sub>ab</sub> | 0.53<br>(-0.04-0.84)         | 0.86<br>(0.58 – 0.96)                | 0.47<br>(-0.11-0.81)  | 0.57<br>(0.25 – 0.83)             | 2.06<br>(1.46 – 3.49) | 0.90<br>(0.64 – 1.53)              | 2.30<br>(1.63 – 3.91) | 1.38<br>(1.10 – 1.93) |     |                        |
|     | 4        | 1.0<br>(0.2) <sub>a</sub>  | 1.1<br>(0.4)               | 1.2<br>(0.6)               | 0.21<br>(-0.39-0.69)         | 0.38<br>(-0.22-0.77)                 | 0.22<br>(-0.38-0.69)  | 0.27<br>(-0.04-0.65)              | 4.10<br>(2.90 – 6.96) | 2.77<br>(1.96 – 4.71)              | 3.98<br>(2.82 – 6.75) | 1.73<br>(1.38 – 2.43) |     |                        |
|     | 5        | 0.9<br>(0.2) <sub>ab</sub> | 1.0<br>(0.2) <sub>ab</sub> | 1.3<br>(0.8)               | 0.77<br>(0.37 – 0.93)        | 0.29<br>(-0.31-0.73)                 | 0.23<br>(-0.37-0.69)  | 0.29<br>(-0.03-0.66)              | 1.22<br>(0.86 – 2.06) | 3.32<br>(2.35 – 5.63)              | 3.91<br>(2.77 – 6.64) | 1.72<br>(1.37 – 2.41) |     |                        |
| RKx | 1        | 2.1<br>(0.5)               | 2.2<br>(0.3)               | 2.2<br>(0.5)               | 0.34<br>(-0.26-0.75)         | 0.66<br>(0.16 – 0.89)                | 0.26<br>(-0.35-0.71)  | 0.46<br>(0.13 – 0.77)             | 2.98<br>(2.11 – 5.06) | 1.58<br>(1.12 – 2.69)              | 3.64<br>(2.58 – 6.19) | 1.52<br>(1.21 – 2.13) |     |                        |
|     | 2        | 2.1<br>(0.5)               | 2.1<br>(0.2)               | 2.2<br>(0.5)               | 0.27<br>(-0.33-0.72)         | 0.43<br>(-0.16-0.79)                 | 0.21<br>(-0.39-0.68)  | 0.33<br>(0.01-0.69)               | 3.52<br>(2.49 – 5.97) | 2.49<br>(1.77 – 4.23)              | 4.12<br>(2.92 – 7.00) | 1.68<br>(1.33 – 2.35) |     |                        |
|     | 3        | 2.1<br>(0.4)               | 2.1<br>(0.4)               | 2.2<br>(0.5)               | 0.37<br>(-0.23-0.77)         | 0.51<br>(-0.06-0.83)                 | 0.15<br>(-0.44-0.65)  | 0.35<br>(0.03-0.70)               | 2.81<br>(1.99 – 4.77) | 2.13<br>(1.51 – 3.61)              | 5.02<br>(3.55 – 8.52) | 1.65<br>(1.32 – 2.32) |     |                        |

| Kin | Interval | Mean (SD)          |       |              | ICC <sup>(3,1)</sup> (95%CI) |               |               | ICC <sup>(3,1)</sup> mean (95%CI) |               |               | TE (stzd) (LL/UL) |               |     | TE (stzd) mean (LL/UL) |
|-----|----------|--------------------|-------|--------------|------------------------------|---------------|---------------|-----------------------------------|---------------|---------------|-------------------|---------------|-----|------------------------|
|     |          | Sn. 1              | Sn. 2 | Sn. 3        | 2-1                          | 3-1           | 3-2           | 2-1                               | 3-1           | 3-2           | 2-1               | 3-1           | 3-2 |                        |
| RKy | 4        | 2.1                | 2.1   | 2.2          | 0.55                         | 0.41          | 0.32          | 0.41                              | 1.98          | 2.61          | 3.14              | 1.58          |     |                        |
|     |          | (0.4)              | (0.3) | (0.5)        | (-0.01-0.84)                 | (-0.19-0.78)  | (-0.29-0.74)  | (0.09 – 0.74)                     | (1.40 – 3.37) | (1.85 – 4.42) | (2.23 – 5.34)     | (1.26 – 2.21) |     |                        |
|     | 5        | 2.1                | 2.1   | 2.2          | 0.60                         | 0.55          | 0.31          | 0.47                              | 1.79          | 1.96          | 3.19              | 1.51          |     |                        |
|     |          | (0.4)              | (0.3) | (0.6)        | (0.07 – 0.87)                | (0.00 – 0.85) | (-0.29-0.74)  | (0.14 – 0.78)                     | (1.27 – 3.04) | (1.39 – 3.33) | (2.26 – 5.42)     | (1.20 – 2.11) |     |                        |
|     | 1        | 2.4                | 2.6   | 2.6          | 0.29                         | 0.53          | 0.49          | 0.45                              | 3.38          | 2.04          | 2.22              | 1.53          |     |                        |
|     |          | (0.5)              | (0.3) | (0.5)        | (-0.32-0.72)                 | (-0.03-0.84)  | (-0.09-0.82)  | (0.12 – 0.77)                     | (2.40 – 5.74) | (1.45 – 3.47) | (1.57 – 3.77)     | (1.22 – 2.14) |     |                        |
|     | 2        | 2.4                | 2.5   | 2.5          | 0.13                         | 0.36          | 0.42          | 0.33                              | 5.43          | 2.85          | 2.51              | 1.67          |     |                        |
|     |          | (0.4)              | (0.3) | (0.5)        | (-0.45-0.64)                 | (-0.24-0.76)  | (-0.17-0.79)  | (0.01 – 0.69)                     | (3.84 – 9.21) | (2.02 – 4.85) | (1.78 – 4.27)     | (1.33 – 2.35) |     |                        |
|     | 3        | 2.4                | 2.5   | 2.6          | 0.79                         | 0.82          | 0.67          | 0.77                              | 1.13          | 1.04          | 1.55              | 1.03          |     |                        |
|     |          | (0.5)              | (0.3) | (0.5)        | (0.39 – 0.93)                | (0.45 – 0.94) | (0.18 – 0.89) | (0.53 – 0.92)                     | (0.79 – 1.98) | (0.73 – 1.83) | (1.09 – 2.62)     | (0.81 – 1.44) |     |                        |
| 4   | 2.4      | 2.5                | 2.6   | 0.39         | 0.66                         | 0.53          | 0.55          | 2.70                              | 1.57          | 2.03          | 1.40              |               |     |                        |
|     | (0.5)    | (0.3)              | (0.5) | (-0.21-0.77) | (0.17 – 0.89)                | (-0.03-0.84)  | (0.23 – 0.82) | (1.92 – 4.59)                     | (1.11 – 2.66) | (1.44 – 3.45) | (1.11 – 1.96)     |               |     |                        |
| RKz | 1        | 2.4                | 2.5   | 2.6          | 0.33                         | 0.59          | 0.50          | 0.49                              | 3.05          | 1.83          | 2.15              | 1.48          |     |                        |
|     |          | (0.7)              | (0.3) | (0.6)        | (-0.27-0.75)                 | (0.05 – 0.86) | (-0.07-0.83)  | (0.16 – 0.79)                     | (2.16 – 5.17) | (1.30 – 3.11) | (1.52 – 3.65)     | (1.18 – 2.08) |     |                        |
|     | 2        | 1.3                | 1.2   | 1.1          | 0.36                         | -0.14         | 0.51          | 0.27                              | 2.89          | 1.06          | 2.13              | 1.74          |     |                        |
|     |          | (0.5)              | (0.6) | (0.5)        | (-0.25-0.76)                 | (-0.65-0.44)* | (-0.06-0.83)  | (-0.04-0.64)                      | (2.05 – 4.91) | (0.75-1.80)*  | (1.51 – 3.61)     | (1.39 – 2.44) |     |                        |
|     | 3        | 1.2                | 1.2   | 1.1          | 0.30                         | -0.15         | 0.47          | 0.23                              | 3.27          | 0.98          | 2.28              | 1.78          |     |                        |
|     |          | (0.5)              | (0.6) | (0.4)        | (-0.30-0.73)                 | (-0.65-0.44)* | (-0.11-0.81)  | (-0.07-0.62)                      | (2.32 – 5.56) | (0.69-1.66)*  | (1.61 – 3.87)     | (1.42 – 2.49) |     |                        |
|     | 4        | 1.0                | 1.0   | 1.0          | 0.84                         | 0.52          | 0.60          | 0.68                              | 0.98          | 2.09          | 1.77              | 1.20          |     |                        |
|     |          | (0.1)              | (0.1) | (0.1)        | (0.53 – 0.95)                | (-0.05-0.83)  | (0.07 – 0.87) | (0.39 – 0.88)                     | (0.69 – 1.66) | (1.48 – 3.55) | (1.26 – 3.01)     | (0.96 – 1.68) |     |                        |
|     | 5        | 1.0                | 1.0   | 1.0          | 0.84                         | 0.75          | 0.87          | 0.81                              | 0.98          | 1.28          | 0.88              | 0.95          |     |                        |
|     |          | (0.2) <sub>a</sub> | (0.1) | (0.1)        | (0.53 – 0.95)                | (0.34 – 0.92) | (0.60 – 0.96) | (0.60 – 0.93)                     | (0.70 – 1.67) | (0.90 – 2.17) | (0.62 – 1.49)     | (0.76 – 1.33) |     |                        |
|     | 5        | 1.0                | 1.0   | 1.1          | 0.85                         | 0.24          | 0.16          | 0.29                              | 0.92          | 3.77          | 4.95              | 1.72          |     |                        |
|     |          | (0.1)              | (0.2) | (0.4)        | (0.57 – 0.96)                | (-0.36-0.70)  | (-0.43-0.65)  | (-0.02-0.66)                      | (0.65 – 1.57) | (2.67 – 6.40) | (3.50 – 8.40)     | (1.37 – 2.41) |     |                        |

Kin = kinematics LKx = left knee flexion/extension, LKy = left knee valgus/varum, LKz = left knee rotation, RKx = right knee flexion/extension, RKy = right knee valgus/varum, RKz = right knee rotation, Sn = session; SD = standard deviation; ICC = intraclass correlation coefficient; CI = confidence interval; TE (stzd) = standardized typical error; LL = lower limit; UL = upper limit.

† < 0.05 vs. Sn. 1; ‡ < 0.05 vs. Sn. 2.

a < 0.05 vs interval 1; b < 0.05 vs. interval 2

**Note: bolded\* = raw data used to calculate typical error**

**Table S19.** Reliability of the LyE for left and right ankle kinematics

| Kin | Interval | Mean (SD)    |                           |                           | ICC <sub>(3,1)</sub> (95%CI) |                       |                       | ICC <sub>(3,1)</sub> mean (95%CI) |                       |                       | TE (stzd) (LL/UL)     |                       |     | TE (stzd) mean (LL/UL) |
|-----|----------|--------------|---------------------------|---------------------------|------------------------------|-----------------------|-----------------------|-----------------------------------|-----------------------|-----------------------|-----------------------|-----------------------|-----|------------------------|
|     |          | Sn. 1        | Sn. 2                     | Sn. 3                     | 2-1                          | 3-1                   | 3-2                   | 2-1                               | 3-1                   | 3-2                   | 2-1                   | 3-1                   | 3-2 |                        |
| LAX | 1        | 1.0<br>(0.5) | 0.9<br>(0.4)              | 0.9<br>(0.4)              | 0.82<br>(0.48 – 0.94)        | 0.70<br>(0.24 – 0.90) | 0.78<br>(0.40 – 0.93) | 0.77<br>(0.53 – 0.92)             | 1.05<br>(0.75 – 1.79) | 1.44<br>(1.02 – 2.44) | 1.18<br>(0.83 – 2.00) | 1.04<br>(0.83 – 1.46) |     |                        |
|     | 2        | 0.9<br>(0.5) | 0.9<br>(0.4)              | 0.9<br>(0.3)              | 0.61<br>(0.08 – 0.87)        | 0.22<br>(-0.38-0.69)  | 0.34<br>(-0.26-0.75)  | 0.42<br>(0.09 – 0.74)             | 1.76<br>(1.25 – 2.98) | 4.03<br>(2.86 – 6.85) | 2.99<br>(2.12 – 5.08) | 1.57<br>(1.25 – 2.21) |     |                        |
|     | 3        | 0.9<br>(0.5) | 1.0<br>(0.4)              | 0.9<br>(0.4)              | 0.74<br>(0.31 – 0.92)        | 0.19<br>(-0.40-0.67)  | 0.32<br>(-0.28-0.74)  | 0.45<br>(0.12 – 0.76)             | 1.32<br>(0.94 – 2.24) | 4.33<br>(3.07 – 7.36) | 3.13<br>(2.21 – 5.31) | 1.53<br>(1.22 – 2.15) |     |                        |
|     | 4        | 0.9<br>(0.5) | 1.0<br>(0.4)              | 1.0<br>(0.3)              | 0.66<br>(0.17 – 0.89)        | 0.12<br>(-0.47-0.63)  | 0.33<br>(-0.27-0.75)  | 0.39<br>(0.06 – 0.72)             | 1.57<br>(1.11 – 2.67) | 5.84<br>(4.14 – 9.92) | 3.05<br>(2.16 – 5.18) | 1.61<br>(1.28 – 2.26) |     |                        |
|     | 5        | 0.9<br>(0.5) | 1.0<br>(0.30)             | 1.0<br>(0.4)              | 0.35<br>(-0.25-0.76)         | 0.42<br>(-0.18-0.79)  | 0.03<br>(-0.53-0.57)  | 0.22<br>(-0.07-0.61)              | 2.92<br>(2.07 – 4.97) | 12.12<br>(8.58-20.57) | 2.56<br>(1.81 – 4.35) | 1.79<br>(1.42 – 2.50) |     |                        |
| LAY | 1        | 1.8<br>(0.5) | 1.8<br>(0.4)              | 1.8<br>(0.5)              | 0.40<br>(-0.27-0.78)         | 0.63<br>(0.07 – 0.88) | 0.32<br>(-0.28-0.74)  | 0.46<br>(0.12 – 0.77)             | 2.61<br>(1.83 – 4.59) | 1.67<br>(1.16 – 2.93) | 3.14<br>(2.22 – 5.33) | 1.52<br>(1.19 – 2.12) |     |                        |
|     | 2        | 1.7<br>(0.5) | 1.8<br>(0.3)              | 1.7<br>(0.4)              | 0.44<br>(-0.15-0.80)         | 0.73<br>(0.29 – 0.91) | 0.42<br>(-0.17-0.79)  | 0.55<br>(0.23 – 0.82)             | 2.45<br>(1.73 – 4.15) | 1.35<br>(0.96 – 2.30) | 2.54<br>(1.80 – 4.30) | 1.40<br>(1.11 – 1.96) |     |                        |
|     | 3        | 1.7<br>(0.6) | 1.8<br>(0.4)              | 1.8<br>(0.5)              | 0.36<br>(-0.24-0.76)         | 0.66<br>(0.16 – 0.89) | 0.52<br>(-0.04-0.83)  | 0.52<br>(0.20 – 0.80)             | 2.84<br>(2.01 – 4.82) | 1.59<br>(1.12 – 2.69) | 2.08<br>(1.47 – 3.53) | 1.44<br>(1.15 – 2.02) |     |                        |
|     | 4        | 1.8<br>(0.6) | 1.8<br>(0.5)              | 1.9<br>(0.5)              | 0.66<br>(0.16 – 0.89)        | 0.74<br>(0.27 – 0.91) | 0.74<br>(0.31 – 0.92) | 0.71<br>(0.43 – 0.89)             | 1.58<br>(1.12 – 2.69) | 1.31<br>(0.91 – 2.30) | 1.31<br>(0.93 – 2.23) | 1.15<br>(0.92 – 1.63) |     |                        |
|     | 5        | 1.7<br>(0.5) | 1.8<br>(0.5)              | 1.8<br>(0.5)              | 0.66<br>(0.17 – 0.89)        | 0.78<br>(0.40 – 0.93) | 0.79<br>(0.42 – 0.93) | 0.74<br>(0.49 – 0.91)             | 1.57<br>(1.12 – 2.67) | 1.17<br>(0.83 – 1.99) | 1.14<br>(0.81 – 1.94) | 1.09<br>(0.87 – 1.52) |     |                        |
| LAz | 1        | 3.1<br>(0.3) | 2.9<br>(0.3) <sub>†</sub> | 2.9<br>(0.4) <sub>†</sub> | 0.65<br>(0.11 – 0.88)        | 0.71<br>(0.22 – 0.91) | 0.87<br>(0.62 – 0.96) | 0.76<br>(0.50 – 0.91)             | 1.59<br>(1.11 – 2.78) | 1.39<br>(0.97 – 2.45) | 0.86<br>(0.61 – 1.46) | 1.06<br>(0.83 – 1.48) |     |                        |
|     | 2        | 3.0<br>(0.2) | 2.9<br>(0.3)              | 2.8<br>(0.3)              | 0.60<br>(0.08 – 0.87)        | 0.70<br>(0.24 – 0.90) | 0.89<br>(0.67 – 0.97) | 0.75<br>(0.50 – 0.91)             | 1.77<br>(1.25 – 3.01) | 1.44<br>(1.02 – 2.44) | 0.78<br>(0.55 – 1.33) | 1.07<br>(0.85 – 1.50) |     |                        |
|     | 3        | 3.0<br>(0.2) | 2.9<br>(0.3)              | 2.9<br>(0.3)              | 0.67<br>(0.19 – 0.89)        | 0.72<br>(0.28 – 0.91) | 0.75<br>(0.34 – 0.92) | 0.72<br>(0.45 – 0.90)             | 1.54<br>(1.09 – 2.61) | 1.36<br>(0.96 – 2.31) | 1.26<br>(0.89 – 2.14) | 1.13<br>(0.90 – 2.14) |     |                        |
|     | 4        | 3.0<br>(0.3) | 3.0<br>(0.3)              | 2.9<br>(0.3)              | 0.58<br>(0.04 – 0.86)        | 0.82<br>(0.48 – 0.94) | 0.62<br>(0.10 – 0.87) | 0.67<br>(0.38 – 0.88)             | 1.86<br>(1.32 – 3.16) | 1.05<br>(0.74 – 1.78) | 1.72<br>(1.22 – 2.91) | 1.22<br>(0.97 – 1.71) |     |                        |
|     | 5        | 3.1<br>(0.2) | 3.0<br>(0.3)              | 3.0<br>(0.4)              | 0.38<br>(-0.22-0.77)         | 0.67<br>(0.18 – 0.89) | 0.69<br>(0.21 – 0.90) | 0.60<br>(0.29 – 0.85)             | 2.77<br>(1.96 – 4.70) | 1.56<br>(1.10 – 2.64) | 1.49<br>(1.05 – 2.52) | 1.32<br>(1.05 – 1.85) |     |                        |
| RAX | 1        | 1.0<br>(0.5) | 1.0<br>(0.4)              | 1.0<br>(0.5)              | 0.38<br>(-0.22-0.77)         | 0.46<br>(-0.13-0.81)  | 0.56<br>(0.01 – 0.85) | 0.47<br>(0.14 – 0.77)             | 2.74<br>(1.94 – 4.65) | 2.36<br>(1.67 – 4.00) | 1.92<br>(1.36 – 3.27) | 1.51<br>(1.20 – 2.12) |     |                        |
|     | 2        | 1.0<br>(0.4) | 1.0<br>(0.4)              | 1.0<br>(0.4)              | 0.73<br>(0.29 – 0.91)        | 0.50<br>(-0.08-0.82)  | 0.53<br>(-0.04-0.84)  | 0.59<br>(0.27 – 0.84)             | 1.35<br>(0.96 – 2.29) | 2.18<br>(1.54 – 3.70) | 2.06<br>(1.46 – 3.50) | 1.35<br>(1.07 – 1.89) |     |                        |
|     | 3        | 1.0<br>(0.3) | 1.0<br>(0.5)              | 1.0<br>(0.3)              | 0.49<br>(-0.15-0.82)         | 0.26<br>(-0.42-0.71)  | 0.50<br>(-0.07-0.83)  | 0.44<br>(0.11 – 0.76)             | 2.19<br>(1.53 – 3.84) | 3.57<br>(2.49 – 6.26) | 2.17<br>(1.53 – 3.68) | 1.54<br>(1.21 – 2.15) |     |                        |

|     |   |              |              |              |                       |                                      |                                      |                       |                       |                                    |                                    |                       |
|-----|---|--------------|--------------|--------------|-----------------------|--------------------------------------|--------------------------------------|-----------------------|-----------------------|------------------------------------|------------------------------------|-----------------------|
| RAY | 4 | 1.0<br>(0.4) | 1.0<br>(0.5) | 0.9<br>(0.4) | 0.46<br>(-0.12-0.81)  | 0.46<br>(-0.13-0.81)                 | 0.51<br>(-0.05-0.83)                 | 0.48<br>(0.15 – 0.78) | 2.33<br>(1.65 – 3.96) | 2.35<br>(1.66 – 3.98)              | 2.11<br>(1.49 – 3.58)              | 1.49<br>(1.19 – 2.09) |
|     | 5 | 1.0<br>(0.3) | 1.0<br>(0.5) | 1.0<br>(0.4) | 0.67<br>(0.18 – 0.89) | 0.89<br>(0.65 – 0.97)                | 0.79<br>(0.43 – 0.94)                | 0.78<br>(0.54 – 0.92) | 1.55<br>(1.10 – 2.64) | 0.80<br>(0.57 – 1.37)              | 1.13<br>(0.80 – 1.92)              | 1.02<br>(0.81 – 1.43) |
|     | 1 | 2.1<br>(0.4) | 2.2<br>(0.4) | 2.1<br>(0.4) | 0.80<br>(0.44 – 0.94) | 0.24<br>(-0.36-0.70)                 | 0.19<br>(-0.40-0.67)                 | 0.40<br>(0.07 – 0.73) | 1.11<br>(0.79 – 1.89) | 3.79<br>(2.68 – 6.43)              | 4.38<br>(3.10 – 7.44)              | 1.60<br>(1.27 – 2.24) |
|     | 2 | 2.1<br>(0.4) | 2.1<br>(0.3) | 2.1<br>(0.4) | 0.77<br>(0.37 – 0.93) | <b>-0.02</b><br><b>(-0.57-0.54)*</b> | <b>-0.01</b><br><b>(-0.56-0.54)*</b> | 0.20<br>(-0.09-0.59)  | 1.22<br>(0.86 – 2.07) | <b>0.82</b><br><b>(0.58-1.40)*</b> | <b>0.78</b><br><b>(0.55-1.32)*</b> | 1.81<br>(1.44 – 2.53) |
|     | 3 | 2.2<br>(0.3) | 2.2<br>(0.3) | 2.2<br>(0.5) | 0.70<br>(0.23 – 0.90) | 0.54<br>(-0.02-0.84)                 | 0.64<br>(0.14 – 0.88)                | 0.62<br>(0.31 – 0.85) | 1.45<br>(1.03 – 2.46) | 2.02<br>(1.43 – 3.42)              | 1.63<br>(1.15 – 2.76)              | 1.30<br>(1.04 – 1.83) |
|     | 4 | 2.2<br>(0.4) | 2.1<br>(0.3) | 2.1<br>(0.4) | 0.39<br>(-0.21-0.77)  | 0.50<br>(-0.07-0.83)                 | 0.27<br>(-0.33-0.72)                 | 0.40<br>(0.07-0.74)   | 2.70<br>(1.92 – 4.59) | 2.16<br>(1.53 – 3.68)              | 3.49<br>(2.47 – 5.93)              | 1.59<br>(1.27 – 2.23) |
|     | 5 | 2.2<br>(0.4) | 2.2<br>(0.4) | 2.1<br>(0.5) | 0.55<br>(-0.01-0.84)  | 0.28<br>(-0.32-0.72)                 | 0.52<br>(-0.05-0.83)                 | 0.44<br>(0.11-0.76)   | 1.98<br>(1.40 – 3.36) | 3.41<br>(2.42 – 5.80)              | 2.10<br>(1.49 – 3.56)              | 1.55<br>(1.23 – 2.17) |
|     | 1 | 3.1<br>(0.4) | 3.1<br>(0.4) | 3.1<br>(0.4) | 0.48<br>(-0.10-0.82)  | 0.62<br>(0.09 – 0.87)                | 0.71<br>(0.26 – 0.91)                | 0.61<br>(0.30 – 0.85) | 2.25<br>(1.60 – 3.83) | 1.73<br>(1.22 – 2.93)              | 1.41<br>(1.00 – 2.40)              | 1.32<br>(1.05 – 1.84) |
|     | 2 | 3.0<br>(0.3) | 2.9<br>(0.3) | 3.0<br>(0.4) | 0.57<br>(0.03 – 0.86) | 0.63<br>(0.12 – 0.88)                | 0.71<br>(0.25 – 0.91)                | 0.64<br>(0.34 – 0.86) | 1.88<br>(1.33 – 3.19) | 1.67<br>(1.19 – 2.84)              | 1.42<br>(1.01 – 2.42)              | 1.27<br>(1.01 – 1.77) |
|     | 3 | 3.1<br>(0.3) | 3.0<br>(0.3) | 3.0<br>(0.4) | 0.46<br>(-0.13-0.81)  | 0.48<br>(-0.10-0.82)                 | 0.76<br>(0.35 – 0.92)                | 0.58<br>(0.26 – 0.83) | 2.36<br>(1.68 – 4.02) | 2.24<br>(1.59 – 3.81)              | 1.25<br>(0.89 – 2.13)              | 1.36<br>(1.09 – 1.31) |
| RAZ | 4 | 3.1<br>(0.3) | 3.1<br>(0.3) | 3.1<br>(0.3) | 0.84<br>(0.54-0.95)   | <b>-0.10</b><br><b>(-0.62-0.48)</b>  | 0.01<br>(-0.55-0.56)                 | 0.30<br>(-0.02-0.67)  | 0.97<br>(0.69-1.65)   | <b>0.68</b><br><b>(0.48-1.15)*</b> | 21.29<br>(15.08-36.14)             | 1.71<br>(1.36-2.39)   |
|     | 5 | 3.1<br>(0.3) | 3.1<br>(0.3) | 3.1<br>(0.4) | 0.44<br>(-0.14-0.80)  | 0.50<br>(-0.07-0.83)                 | 0.64<br>(0.14 – 0.88)                | 0.54<br>(0.22 – 0.81) | 2.42<br>(1.71 – 4.10) | 2.16<br>(1.53 – 3.67)              | 1.63<br>(1.15 – 2.77)              | 1.41<br>(1.13 – 1.98) |

Kin = kinematics LAx = left ankle dorsi/plantarflexion, LAy = left foot progression, LAZ = left foot rotation, RAx = right ankle dorsi/plantaflexion, RAY = right foot progression, RAZ = right foot rotation, Sn = session; SD = standard deviation; ICC = intraclass correlation coefficient; CI = confidence interval; TE (stzd) = standardized typical error; LL = lower limit; UL = upper limit.

† < 0.05 vs. Sn. 2; ‡ < 0.05 vs. Sn. 3.

**Note: bolded\* = raw data used to calculate typical error**
